1 Original Article

2 Spatial transcriptomics reveals the two cancer stem cell-like populations in  
3 triple-negative breast cancer

4

5 Jun Nakayama<sup>1,2,3,\*</sup>, Hiroko Matsunaga<sup>4</sup>, Koji Arikawa<sup>3,4</sup>, Takuya Yoda<sup>2,4</sup>, Masahito  
6 Hosokawa<sup>2,3,4</sup>, Haruko Takeyama<sup>2,3,4</sup>, Yusuke Yamamoto<sup>1</sup>, Kentaro Semba<sup>2,5,\*</sup>

7

8 1 Laboratory of Integrative Oncology, National Cancer Center Research Institute, Tokyo,  
9 Japan.

10 2 Department of Life Science and Medical Bioscience, School of Advanced Science and  
11 Engineering, Waseda University, Tokyo, Japan.

12 3 Computational Bio-Big Data Open Innovation Lab. (CBBDOIL), National Institute of  
13 Advanced Industrial Science and Technology (AIST), Tokyo, Japan.

14 4 Research Organization for Nano & Life Innovation, Waseda University, Tokyo, Japan.

15 5 Translational Research Center, Fukushima Medical University, Fukushima, Japan.

16

17 \*Correspondence to: Jun Nakayama ([junakaya@ncc.go.jp](mailto:junakaya@ncc.go.jp), [jnakayama.re@gmail.com](mailto:jnakayama.re@gmail.com))

18 and Kentaro Semba ([ksemba@waseda.jp](mailto:ksemba@waseda.jp))

19

20

21 **Abstract**

22 Gene expression analysis at the single-cell scale by next generation sequencing has

23 revealed the existence of clonal dissemination in cancer metastasis. The current spatial

24 analysis technologies elucidate the heterogeneity of cell-cell interactions *in situ*;  
25 however, further analysis is needed to elucidate the nature of tumor heterogeneity. To  
26 reveal the expressional heterogeneity and cell-cell interactions in primary tumors and  
27 metastases, we performed transcriptomic analysis of microtissues dissected from a  
28 triple-negative breast cancer (TNBC) cell line MDA-MB-231 xenograft model by our  
29 automated tissue microdissection punching technology. This multiple-microtissue  
30 transcriptome analysis revealed that there were existed three cell-type clusters in the  
31 primary tumor and axillary lymph node metastasis, two of which were cancer stem  
32 cell-like clusters (CD44/MYC-high, HMGA1-high). The CD44/MYC-high cluster showed  
33 aggressive proliferation with MYC expression. The HMGA1-high cluster exhibited  
34 HIF1A activation and upregulation of ribosomal processes. Furthermore, we developed  
35 a cell-cell Interaction (CCI) analysis to investigate the ligand-receptor interactions  
36 (cancer cell to stroma and stroma to cancer cell) in each spot. The CCI analysis  
37 revealed the interaction dynamics generated by the combination of cancer cells and  
38 stromal cells in primary tumors and metastases. Two cancer stem cell-like populations  
39 were also detected by the scRNA-seq analysis of TNBC patients. In addition, the gene  
40 signature of the HMGA1-high cancer stem cell-like cluster has the potential to serve as  
41 a novel biomarker for diagnosis. The mixture of these multiple cancer stem cell-like  
42 populations may cause differential anticancer drug resistance, increasing the difficulty  
43 of curing this cancer.

#### 44 **Introduction**

45 Breast cancer cells metastasize to multiple distant organs, such as the axillary lymph  
46 nodes, lungs, bone, liver, and brain (Nakayama *et al*, 2021; Obenauf & Massague,  
47 2015). In particular, metastasis to axillary lymph nodes is an indicator of cancer grade in  
48 breast cancer patients (Giuliano *et al*, 2011). Most breast cancer tissues, including  
49 distant metastases, exhibit genetic heterogeneity (McGranahan & Swanton, 2017).  
50 Single-cell analyses have revealed that cancer cells evolve through the acquisition of  
51 genomic mutations in the primary tumor and metastases (Echeverria *et al*, 2018; Yates  
52 *et al*, 2017). Most previous analyses have been performed using isolated cancer cells  
53 and stromal cells from cancer tissues. Thus, the cell-cell interactions between cancer  
54 cells and stromal cells remains to be analyzed. In recent studies, the current single-cell  
55 analysis and spatial transcriptome technologies reveal the heterogeneity of cell-cell  
56 interactions between cancer cells and stromal cells *in situ* (Andersson *et al*, 2021; Wu *et*  
57 *al*, 2021); however, further analysis is needed to elucidate the nature of tumor  
58 heterogeneity.

59           Comprehensive gene expression analysis of metastases harvested from  
60 approximately 500 specimens in a various cancer types and metastatic organs  
61 (MET500 cohort) have suggested that metastatic tissues could be divided into several  
62 categories (e.g. proliferative or EMT-like/inflammatory) (Robinson *et al*, 2017). In  
63 particular, some samples were found to show signatures of more than one category,  
64 suggesting that these samples had micro intraheterogeneity. To clarify such  
65 heterogeneity, microtissue sectioning using the laser capture microdissection has often

66 been performed (Civita *et al*, 2019). This method has several disadvantages, however,  
67 including the laborious and time-consuming nature of sample handling and a high risk of  
68 RNA degradation. Thus, in previous work, we developed a system involving automated  
69 tissue microdissection punching followed by transcriptomic analysis of the tumor  
70 microtissue (Yoda *et al*, 2017). To analyze the expressional heterogeneity in  
71 microtissues from the primary tumor and axillary lymph node metastases, we performed  
72 analysis of the spatial microtissue transcriptome in the triple-negative breast cancer  
73 (TNBC) cell line MDA-MB-231 xenograft model. We focused on the expression profiles  
74 of known metastasis-promoting genes and cancer stem cell markers in dissected  
75 microtissues.

76

77

## 78 **Results**

### 79 **Sampling microtissues from primary tumors and axillary lymph node metastases** 80 **in MDA-MB-231 xenografts**

81 Primary tumors and axillary lymph node metastases were harvested from NOD-SCID  
82 mice with MDA-MB-231-parent-*Venus* cell line xenografts. We subjected the sliced  
83 tissues to microtissue dissection by an automated tissue microdissection punching  
84 system (Figure 1A). RNA was successfully recovered from the microtissues collected at  
85 93 spots in the primary lesion and 44 spots in axillary lymph node metastases using a  
86 microtissue automatic sampling device (Figure 1B). In samples of this size, although the  
87 number of cells present in the tumor tissue varies, it can be inferred that several to



88 approximately 10-30 cells are present in each spot (Yoda *et al.*, 2017). RNA-seq  
89 analysis was performed on the total RNA extracted from each spot. We checked the  
90 quality of the fastq files by FASTQC. Total RNA samples contained RNA from human  
91 cancer cell lines and RNA from mouse stromal cells in the tumor microenvironment.  
92 Therefore, the obtained sequences were mapped to both the human reference genome  
93 and the mouse reference genome by HISAT2 (Kim *et al.*, 2019). Protein-coding genes  
94 (human: 19961 genes, mouse: 22050 genes) were extracted as transcripts per million  
95 (TPM) for spatial transcriptome analysis with Seurat (Butler *et al.*, 2018; Stuart *et al.*,  
96 2019) (Figure 1C, Supplementary Figure S1A, S1B and S1C).

97

### 98 **Analysis of microtissue transcriptomes**

99 The clustering analysis and UMAP plots showed 3 clusters of cancer cells (transcripts  
100 mapped to the human reference genome) and 4 clusters of stromal cells (transcripts  
101 mapped to the mouse reference genome) in the microspots dissected from primary  
102 tumors and axillary lymph node metastases (Figure 2A and B). Next, we evaluated the  
103 expression of cancer stem cell markers to focus on cell-cell interactions in the  
104 metastatic stem cell niche (Oskarsson *et al.*, 2014). We found that human cancer  
105 clusters showed specific gene expression patterns for high mobility group AT-Hook1  
106 (HMGA1), CD44, and MYC (Figure 2C). Consequently, these human clusters were  
107 named HMGA1-high, CD44/MYC-high, and Marker-low. Mouse stromal clusters  
108 showed specific gene expression patterns for transthyretin (Ttr), Cd3d (T-cell marker),  
109 membrane spanning 4-domains a1 (Ms4a1, B-cell marker), and inhibin subunit beta A

110 (Inhba; a subunit of both activin and inhibin) (Figure 2D). Ttr and Inhba were highly  
111 expressed in their respective specific clusters (Supplementary Table S2). Therefore,  
112 these mouse clusters were named Ttr-high, Tcell-like, Inhba-high, and Bcell-like. CD44  
113 was broadly expressed in all human clusters; however, HMGA1 was expressed in only  
114 HMGA1-high clusters (Figure 2E). CD44 and HMGA1 are well-known markers of cancer  
115 stem cells in breast cancer (Liu *et al*, 2010; Pegoraro *et al*, 2013). These results  
116 suggested that 2 types of cancer stem cell-like populations existed in MDA-MB-231  
117 xenograft models.

118           The heterogeneity of each cluster was demonstrated by calculation of network  
119 topology using the normalized closeness centrality (Watanabe *et al*, 2020). The  
120 centralities showed the correlation of gene expression in each cluster. These results  
121 showed that the cancer cells in the HMGA1 clusters had a the expanded diverse of  
122 expressional heterogeneity compared with CD44/MYC clusters (Supplementary Figure  
123 S1D and S1E). Interestingly, although 3 human clusters were present in both the  
124 primary tumors and the lymph node metastases (Figure 2F), mouse stromal clusters  
125 showed a site-specific pattern. Most of the Ttr-high clusters were observed in the  
126 primary tumors. On the other hand, most Tcell-like clusters and B-cell-like clusters were  
127 found in the lymph node metastases (Figure 2G).

128           Next, we performed spot analysis with the spatial information to determine the  
129 spatial heterogeneity in the xenografts (Figure 3A, 3B, and 3C). Human  
130 CD44/MYC-high cancer cells tend to localize the outside of the primary tumor. However,  
131 lymph node metastases did not show such a tendency (Figure 3A). Cell cycle analysis

132 of cancer cells showed that cell proliferation occurred outside of the primary tumor and  
133 at sparse sites among the lymph node metastases (Figure 3B). Approximately 50 % of  
134 the cells in CD44/MYC-high clusters and 30% of the cells in HMGA1-high clusters were  
135 actively undergoing cell division (Supplementary Figure S2A, 3D and Supplementary  
136 Table S3). These results suggested that the cells divided from two cancer stem cell-like  
137 clusters, leading to cancer expressional heterogeneity. Mouse stromal cell localization  
138 showed that most Tcell-like clusters were present throughout the entire lymph node  
139 metastases; on the other hand, Tcell-like clusters also existed outside of the primary  
140 tumor. Most Ttr-high clusters were present at the sparse primary tumor (Figure 3C). The  
141 mouse Tcell-like clusters and Inhba-high clusters were recruited into the cell cycle  
142 (Supplementary Figure S2B, S2C, S2D and Supplementary Table S3). Next, a  
143 comparative analysis of the cell cycle in the primary tumor and lymph node metastasis  
144 showed that the two cancer stem cell-like clusters (HMGA1-high and CD44/MYC-high)  
145 increased the cell division index in lymph node metastases (Figure 3E). In contrast,  
146 Marker-low clusters did not change the cell cycle index in either location. This result  
147 suggested that the cancer stem-like cells in metastatic tissues proliferated aggressively.

148

#### 149 **Enrichment analysis of microspots**

150 The differentially expressed genes (DEGs) in human clusters and mouse  
151 clusters were extracted and visualized in heatmaps (Figure 4A, Supplementary Figure  
152 S51, S5B, Table S2 and S4). The human HMGA1-high cluster showed that high  
153 expression of TMSB10 (Zhang *et al*, 2017), CTSD (Ashraf *et al*, 2019) and LGALS1

154 (Balestrieri *et al*, 2021; Jung *et al*, 2007), which are correlated with poor prognosis in  
155 breast cancer. The human CD44/MYC-high cluster expressed SENPK, SENPN and  
156 PTK2 (focal adhesion kinase: FAK), which regulate the cell cycle and cell division. The  
157 human Marker-low clusters showed that low expression levels of these genes. The  
158 mouse Tcell-like clusters expressed cytokines and immune receptors. To determine the  
159 biological function of DEGs, we performed upstream analysis, GO enrichment analysis  
160 and pathway enrichment analysis using Metascape (Zhou *et al*, 2019). DEGs from each  
161 human cluster showed the upregulated DEGs in the HMGA1-high clusters and  
162 CD44/MYC-high clusters, and downregulated DEGs in the Marker-low clusters (Figure  
163 4A, Supplementary Table S2 and S4). Upstream analysis of DEGs showed that HIF1A  
164 downstream genes were upregulated in the HMGA1-high cluster, and MYC  
165 downstream genes were upregulated in the CD44/MYC-high cluster. In the Marker-low  
166 clusters, E2F1 downstream genes were downregulated (Figure 4B). We performed  
167 pathway and GO enrichment analyses focused on the two cancer stem cell-like clusters  
168 that had upregulated DEGs. Amide metabolites, VEGFA-VEGFR signaling, and  
169 apoptosis regulation were enriched in both clusters. On the other hand, the DEGs in  
170 CD44/MYC-high clusters were enriched in many terms related to the cell cycle and cell  
171 division, namely, cell division, cell cycle, and telomeres. In HMGA1-high clusters,  
172 ribosome assembly and ribosome biogenesis were significantly enriched (Figure 4C, 4D  
173 and Supplementary Figure S3). The results of enrichment analysis using DEGs in the  
174 Marker-low clusters showed that metabolism of RNA, translation, and mitochondrial  
175 organization were enriched (Supplementary Figure S4).

176 In mouse clusters, enrichment analysis of the DEGs was performed by using  
177 Metascape. Enrichment analysis of the DEGs in the Ttr-high clusters showed no  
178 enriched terms. The Tcell-like clusters and Inhba-high clusters had two common  
179 enriched terms; glycolysis and neutrophil degradation (Supplementary Figure S5).

180

### 181 **Cell-cell interaction (CCI) analysis of microspots**

182 To estimate the CCI score, we utilized a cell-cell interaction database  
183 (<https://baderlab.org/>) and extracted a total of 115,900 interactions (3,209 ligands,  
184 4,364 receptors and 433 extracellular matrix) (Watanabe *et al.*, 2020). Highly expressed  
185 genes (expression level > 2) were selected for CCI analysis, and ligand-receptor  
186 interactions (human to mouse and mouse to human) were estimated in each spot  
187 (Figure 5A). We extracted 2,432 interactions and 7 clusters of “mouse (stromal) to  
188 human (cancer)” CCI patterns (Figure 5B and Supplementary Table S7). In particular,  
189 Cluster 2 was constituted by only lymph node metastasis spots, while Cluster 6 was  
190 constituted by only primary tumor spots. We thus focused on these clusters: the CCI  
191 heatmap showed lymph node metastasis-specific CCI (Figure 5C and 5D) and primary  
192 tumor-specific CCI (Figure 5E and 5F). The “human (cancer) to mouse (stromal)” CCI  
193 pattern showed 741 interactions (Supplementary Figure S6, Supplementary Table S7  
194 and S8).

195 Next, we focused on cell type-specific CCI. Ten sets of cancer cell-stromal  
196 cell interactions were observed (Figure 6A and 6B). The PT-1, PT-2 and PT-3 groups  
197 existed in only the primary tumors; in contrast, the Mix-1~7 groups were present in both

198 the primary tumors and lymph node metastases (Figure 6C). As a result, 4,126  
199 interactions “cancer to stromal” (Supplementary Table S8) and 4,165 interactions of  
200 “mouse (stromal) to human (cancer)” (Supplementary Table S9) were estimated from  
201 the cell type-specific CCI analysis. The ligand-receptor interaction with the highest CCI  
202 score was shown for each group (Figure 6D-G). Among cancer cell-to-stromal  
203 interactions, annexin A2 (ANXA2) and heat shock protein 90 alpha (HSP90AA1) had  
204 high CCI scores in various groups. On the other hand, from stromal to cancer cell  
205 interactions, B2m interactions were estimated in various groups. Alb interaction was  
206 estimated in the Mix5 and Mix6 groups. The interactions of the Tcell-like cluster (Mix-1,  
207 Mix-3 and Mix-5) changed depending on the type of cancer cell (Figure 6E and 6G).  
208 Similarly, the Ttr-high (PT-1, PT-2 and Mix-4) cluster interactions also changed  
209 depending on the type of cancer cell. On the other hand, in view of the stromal to cancer  
210 interaction, the Mix5 and Mix6 clusters have specific interactions with proteins such as  
211 integrin B1 (ITGB1) and cystatin C3 (CST3) (Figure 6G).

212

### 213 **TNBC patients showed two cancer stem cell-like populations**

214 To confirm our findings in clinical samples, we reanalyzed the public single-cell  
215 RNA-seq (scRNA-seq) dataset (Karaayvaz *et al*, 2018) and the Molecular Taxonomy of  
216 Breast Cancer International Consortium (METABRIC) (Pereira *et al*, 2016). First, we  
217 analyzed the scRNA-seq dataset of 5 TNBC patients (Figure 7A). We extracted 546  
218 cancer cells from the dataset with UMAP visualization (Figure 7B). Module analysis was  
219 performed using the HMGA1 signatures and CD44/MYC signatures from DEG analysis

220 to detect the HMGA1-high cluster and CD44/MYC cluster in TNBC patients. TNBC  
221 patients had the two cancer stem cell-like populations and a double-positive population  
222 (Figure 7C, 7D, Supplementary Tables S10 and S11). Next, survival analysis was  
223 performed using the HMGA1 signatures and CD44/MYC signatures with METABRIC  
224 claudin-low subtype (TNBC) cohorts. High expression of HMGA1 signatures correlated  
225 with poor prognosis in the claudin-low subtype (Figure 7E). In contrast, CD44/MYC  
226 signatures did not correlate with prognosis in these cohorts (Supplementary Figure S7).

227

228

## 229 **Discussion**

230 Spatial transcriptomics technologies (Rodriques *et al*, 2019; Yoda *et al.*, 2017)  
231 have enabled us to reveal the *in situ* expressional profiles and microheterogeneity of  
232 cancer. In particular, in a xenograft model, both human-derived RNA and  
233 mouse-derived RNA can be analyzed both simultaneously and individually by mapping  
234 the sequence reads to a human genome reference or mouse genome reference  
235 (Bradford *et al*, 2013; Callari *et al*, 2018). In this study, by combining microtissue  
236 sampling and the isolation of human-mouse gene expression by mapping, we revealed  
237 the expressional heterogeneity of cancer cells and stromal cells, and the heterogeneity  
238 of cancer-stroma interactions in MDA-MB-231 primary tumors and the axillary lymph  
239 node metastases.

240 Interestingly, we observed two types of cancer stem cell-like populations in  
241 both the primary tumors and lymph node metastases. One of the cancer stem cell-like

242 populations expressed CD44 and MYC. The CD44 gene is a well-known cancer stem  
243 cell marker in breast cancer (Liu *et al.*, 2010; Marotta *et al.*, 2011; Sheridan *et al.*, 2006).  
244 Most MDA-MB-231 cells expressed high levels of CD44 (Burdick *et al.*, 2012), although  
245 the expression levels varied (Figure 2E). The cluster with the highest CD44 expression  
246 was MYC, and these cells proliferated aggressively *in vivo*. The other cancer stem  
247 cell-like population, the HMGA1-high cluster, was observed in both the primary tumors  
248 and lymph node metastases. HMGA1 promotes tumor initiation, cancer stemness and  
249 metastasis in TNBC (Huang *et al.*, 2015; Pegoraro *et al.*, 2013; Shah *et al.*, 2013). The  
250 DEGs enrichment analysis indicated that HIF1A activation and ribosomal-related  
251 bioprocesses were enriched in the HMGA1-high cancer stem cell-like population. HIF1A  
252 is a well-known regulator of hypoxia that activates stemness, glycolysis, angiogenesis,  
253 and invasion/metastasis (Choudhry & Harris, 2018; Petrova *et al.*, 2018). In terms of  
254 ribosomal-related processes, the upregulation of translation and ribosomal processes  
255 may promote distant metastasis in breast cancer (Ebright *et al.*, 2020). In the clinical  
256 scRNA-seq analysis, both types of cancer stem cell-like populations were observed in  
257 single-cell analysis of TNBC patients (Karaayvaz *et al.*, 2018). Our results showed that  
258 the mixture of these multicancer stem cell-like populations makes curative treatment  
259 difficult and causes the anticancer drug resistance in the clinic. In addition, the HMGA1  
260 signatures has the potential to be a novel biomarker for diagnosis, and HMGA1-high  
261 cancer stem cells may contribute to poor prognosis.

262           Our results showed Ttr-high and Inhba-high stromal populations in the  
263 xenograft model. High expression of transthyretin (Ttr) enhances tumor proliferation and



264 growth (Lee *et al*, 2019). *Inhba* is a member of the TGF-beta superfamily (Bloise *et al*,  
265 2019). *Inhba* is upregulated in breast tumors, and induces epithelial-mesenchymal  
266 transition (EMT), tumor growth and distant metastasis (Bashir *et al*, 2015; Kalli *et al*,  
267 2019). Most *Inhba*-high populations also existed in the primary tumor. Our results  
268 suggested that stromal expression of *Ttr* and *Inhba* enhanced tumor growth in the  
269 primary tumors of MDA-MB-231 xenografts.

270 CCI analysis of each the spot and group was performed to understand the  
271 interaction dynamics of different combination of cancer cell and stromal cell types. This  
272 analysis will be helpful for discovering the cancer stem cell niche and metastatic niche  
273 (Oskarsson *et al.*, 2014). *B2M* is a gene that presents self-antigens on the plasma  
274 membrane. Cancer cells present self-antigens to immune cells in the tumor tissue  
275 (Popat *et al*, 2020). *B2M* has a different molecular regulatory mechanism in ER-positive  
276 and ER-negative breast cancer, and it controls the proliferation of cancer cells (Chai *et*  
277 *al*, 2019). Our results suggested that MDA-MB-231 cells interact with immune cells  
278 through *B2M* antigen presentation, which controls cancer cell proliferation in the  
279 xenograft model. In addition, *HSP90AA1* and *ANXA2* expressed by cancer cells had  
280 high CCI scores in the spot CCI analysis. High expression of *HSP90AA1* in TNBC or  
281 HER2-/ER+ breast cancer patients is correlated with poor prognosis, and the  
282 *HSP90AA1* gene is often amplified (Cheng *et al*, 2012). *HSP90AA1* is secreted in  
283 extracellular vesicles under hypoxia and enhances the migration of cancer cells and  
284 stromal cells in breast cancer (Santos *et al*, 2017). *HSP90AA1* may contribute to the  
285 involvement of extracellular proteins in the cell–cell interactions. High expression of

286 ANXA2 is correlated with poor prognosis in TNBC patients (Gibbs & Vishwanatha,  
287 2018) and regulates drug resistance to EGFR1-targeted therapy (Fan *et al*, 2019;  
288 Zhang *et al*, 2018). ANXA2 controls angiogenesis in TNBC xenografts and has the  
289 potential to be a novel therapeutic target in TNBC (Sharma & Jain, 2020). ANXA2 is a  
290 regulator of endocytosis and exocytosis on the plasma membrane (Bharadwaj *et al*,  
291 2013; Grindheim *et al*, 2017). This interaction has the potential to mediate cell-cell  
292 communication via exosomes, and thereby promotes the migration of cancer cells and  
293 immune cells.

294           Several spots did not contain enough RNA for analysis or exhibited bias  
295 toward either human RNA or mouse RNA (Supplementary Figure S1A). Thus, one  
296 limitation of this sampling method is that some spots have a biased cell type or no cells.  
297 Read counts of each cluster showed lower counts for the human Marker-low cluster,  
298 mouse Ttr-high cluster, mouse Inhba-high cluster, and mouse B-cell like cluster than for  
299 other clusters (Supplementary Figure S1B and S1C). The limitations of cell type bias  
300 and low RNA extraction efficiency caused these low transcript counts.

301           Our results showed that HMGA1 signatures correlated with poor prognosis in  
302 TNBC patients in the METABRIC cohort; on the other hand, CD44/MYC signatures did  
303 not correlate with progression (Supplementary Figure S7). Previous research reported  
304 that the diagnosis of invasive breast cancer on the basis of CD44 expression alone is  
305 difficult and that it is necessary to examine the expression of other genes (Mylona *et al*,  
306 2008; Wang *et al*, 2017). Our study supports that CD44 signatures are not sufficient for  
307 diagnosis. In contrast, HMGA1 signatures is useful for the diagnosis of TNBC patients.

308 Our results showed that these spatial transcriptomics methods will be helpful for the  
309 diagnosis, further identification of biomarkers, and elucidation of the essential  
310 characteristics of cancer.

311

312

### 313 **Materials and Methods**

#### 314 **Cell culture**

315 The MDA-MB-231-*luc2-Venus* cell line was cultured in RPMI-1640 (Fujifilm Wako,  
316 Osaka, Japan) supplemented with 10% heat-inactivated fetal bovine serum (FBS,  
317 Fujifilm Wako), 100 µg/ml streptomycin (Meiji Seika Pharma Co. Ltd. Tokyo, Japan) and  
318 100 U/ml penicillin (Meiji Seika Pharma) at 37°C with 5% CO<sub>2</sub>.

319

#### 320 **Animal studies**

321 A. breast cancer xenograft model was established in NOD.CB-17-Prkdc<sup>scid</sup>/J mice  
322 (NOD-SCID; Charles River Laboratories Japan, Inc., Kanagawa, Japan) by orthotopic  
323 transplantation as previously described (Nakayama *et al*, 2017). A total of 1.0 x 10<sup>6</sup> cells  
324 were injected into the 4th fat pad of NOD-SCID mice. The primary tumor was removed 8  
325 weeks after transplantation. An axillary lymph node metastasis was sampled 2 weeks  
326 after removing the primary tumor. The growth of the primary tumors and metastases  
327 were monitored by bioluminescence using an in vivo imaging system (IVIS-XRMS,  
328 PerkinElmer, MA, USA). For bioluminescence monitoring by IVIS, mice were  
329 anesthetized with 2.5% isoflurane (Fujifilm Wako) and intraperitoneally injected with

330 3 mg D-luciferin (Gold Biotechnology Inc., MO, USA) in 200 µl PBS as previously  
331 described (Han *et al*, 2020; Nakayama *et al*, 2020). The harvested organs were placed  
332 in ice-cold PBS (Fujifilm Wako) and embedded in SCEM (Super Cryoembedding  
333 Medium, SECTION-LAB, Japan) using liquid nitrogen and stored at -80 degree until  
334 sectioning.

335

### 336 **Microtissue dissection and RNA-seq analysis**

337 Microtissue sampling was performed by an automated tissue microdissection punching  
338 system as previously described (Yoda *et al.*, 2017). Frozen sections were sliced at a  
339 thickness of 20 µm and transferred on an LMD film II (SECTION-LAB). Microspots were  
340 sampled with a 100 µm needle in the dissection instrument. RNA-seq was performed by  
341 Illumina HiSeq as previously described (Yoda *et al.*, 2017).

342

### 343 **Mapping and quality check**

344 Transcriptome analysis was performed with HISAT2 version 2.0.5 (Kim *et al.*, 2019) and  
345 RSEM version 1.3.0 (Li & Dewey, 2011). The gene expression of cancer cells was  
346 obtained by mapping RNA-sequence reads to the human reference genome or mouse  
347 reference genome. We subjected 'protein\_coding' genes to spatial transcriptome  
348 analysis.

349

### 350 **Clustering and UMAP visualization**

351 Data mining analyses such as clustering, UMAP analysis, and DEG extraction were  
352 performed with the functions 'runPCA', 'FindNeighbors', 'FindClusters', and 'runUMAP'  
353 and 'FindAllMarkers' in 'Seurat' version 3.2. (Stuart *et al.*, 2019). Cell cycle detection  
354 was performed by the function 'CellCycleScoring'. Heatmap drawing was performed  
355 using 'ComplexHeatmap'(Gu *et al.*, 2016). These packages and functions were run in R  
356 version 3.6.3.

357

### 358 **Network analysis for expressional heterogeneity**

359 Correlational network analysis for calculation of the expressional heterogeneity was  
360 performed by the 'igraph' package as previously described (Nakayama *et al.*, 2017;  
361 Watanabe *et al.*, 2020). We calculated Pearson's correlational coefficients between the  
362 spots classified into the same clusters. Next we calculated the normalized closeness  
363 centrality using the correlational network.

364

### 365 **Enrichment analysis using DEGs**

366 Pathway and GO enrichment analyses were performed by the Metascape  
367 (<https://metascape.org/gp/index.html#/main/step1>) (Zhou *et al.*, 2019). DEGs from each  
368 cluster were subjected to the Metascape interface. Differential enrichment terms were  
369 analyzed by multiple gene list mode. The results of enrichment analysis were visualized  
370 as heatmaps and networks.

371

### 372 **Cell-Cell Interaction (CCI) analysis**

373 Ligand-receptor interactions between human cancer cells and mouse stromal cells were  
374 performed using the interaction database of the Bader laboratory from Toronto  
375 University ([https://baderlab.org/CellCellInteractions#Download\\_Data](https://baderlab.org/CellCellInteractions#Download_Data)) in R software  
376 version 3.6.3. For spot CCI analysis, we extracted the genes whose expression value  
377 was greater than 2. We selected the combinations representing ligand-receptor  
378 interactions, in which both ligand genes and receptor genes were expressed in the  
379 same spot. Hierarchical clustering was performed by 'hclust' and it was visualized as a  
380 circular clustering plot by the 'circlize' package in R (Gu *et al.*, 2014).

381           In the CCI analysis of the group with containing both human cancer cells and  
382 mouse stromal cells, we calculated the number of spots with expression values greater  
383 than 2. Only groups whose expression cell ratio exceeded 10% were extracted for CCI  
384 analysis, and the CCI score between each group was calculated as previously  
385 described (Watanabe *et al.*, 2020).

386

### 387 **Analysis of the public single-cell RNA-seq dataset**

388 To confirm the cancer stem cell signatures in MDA-MB-231 xenografts, we performed  
389 reanalysis of scRNA-seq of TNBC patients from the public cohort (Karaayvaz *et al.*,  
390 2018). The normalized scRNA-seq dataset was downloaded the GSE138390 dataset  
391 from the Gene Expression Omnibus (GEO) and analyzed with the annotation metadata.  
392 The dataset was analyzed and visualized by the UMAP plot with Seurat in R. Module  
393 analysis was performed using the function 'AddModuleScore' with gene signatures  
394 (Supplementary Table S10) in 'Seurat'.

395

396 **Clinical dataset analysis**

397 Survival analysis of the Molecular Taxonomy of Breast Cancer International Consortium  
398 (METABRIC) cohort (Ali *et al*, 2020; Curtis *et al*, 2012; Pereira *et al*, 2016) was  
399 performed by the Kaplan-Meier method using the 'ggplot2', 'survminer' and 'survival'  
400 packages with R as previously described (Kuroiwa *et al*, 2020; Murakami *et al*, 2019;  
401 Nishiyama *et al*, 2021)

402

403 **Code availability**

404 The source code of spatial transcriptome analysis is available on GitHub  
405 (<https://github.com/JunNakayama/Spatial-Transcriptomics-of-MDA-MB-231-xenografts>)

406 .

407

408 **Data availability**

409 Spatial expression data (RNA-seq of each microspot) were deposited at GEO  
410 accession number GSE184720.

411

412

413 **Acknowledgements**

414 We thank Prof. Semba's laboratory, Prof. Takeyama's laboratory and CBBB-OIL (AIST)  
415 for meaningful discussion and Mr. Kiyofumi Takahashi and Ms. Chikako Sakanashi for  
416 technical support.

417

418 **Funding**

419 This study was supported in part by JSPS KAKENHI (Grant Numbers: 18K16269,  
420 20J01794, and 21K15562 to J.N.), and Platform Project for Supporting Drug Discovery  
421 and Life Science Research (Basis for Supporting Innovative Drug Discovery and Life  
422 Science Research (BINDS)) from AMED under Grant Number JP19am0101004. The  
423 supercomputing resource was provided by the Human Genome Center (University of  
424 Tokyo).

425

426 **Authors' Contributions**

427 JN designed the study, performed the animal experiments and analysis of spatial  
428 transcriptomics, and wrote the manuscript. HM and TY performed the dissection of  
429 micro-tissues. KA performed analysis of NGS data. MH designed the experiment of  
430 micro-tissue dissection and interpreted the results. HT, YY and KS interpreted the  
431 results. All authors reviewed the manuscript.

432

433 **Competing Interests**

434 The authors declare that no conflict of interest exists.



435 **Reference**

436 Ali HR, Jackson HW, Zanutelli VRT, Danenberg E, Fischer JR, Bardwell H,

437 Provenzano E, Ali HR, Al Sa'd M, Alon S *et al* (2020) Imaging mass cytometry

438 and multiplatform genomics define the phenogenomic landscape of breast

439 cancer. *Nat Cancer* 1: 163-175

440 Andersson A, Larsson L, Stenbeck L, Salmén F, Ehinger A, Wu SZ, Al-Eryani G,

441 Roden D, Swarbrick A, Borg Å *et al* (2021) Spatial deconvolution of

442 HER2-positive breast cancer delineates tumor-associated cell type interactions.

443 *Nat Commun* 12: 6012

444 Ashraf Y, Mansouri H, Laurent-Matha V, Alcaraz LB, Roger P, Guiu S, Derocq D,

445 Robin G, Michaud HA, Delpech H *et al* (2019) Immunotherapy of triple-negative

446 breast cancer with cathepsin D-targeting antibodies. *J Immunother Cancer* 7: 29

447 Balestrieri K, Kew K, McDaniel M, Ramez M, Pittman HK, Murray G, Vohra NA,

448 Verbanac KM (2021) Proteomic identification of tumor- and

449 metastasis-associated galectin-1 in claudin-low breast cancer. *Biochim Biophys*

450 *Acta Gen Subj* 1865: 129784

451 Bashir M, Damineni S, Mukherjee G, Kondaiah P (2015) Activin-A signaling  
452 promotes epithelial-mesenchymal transition, invasion, and metastatic growth of  
453 breast cancer. *NPJ Breast Cancer* 1: 15007

454 Bharadwaj A, Bydoun M, Holloway R, Waisman D (2013) Annexin A2  
455 heterotetramer: structure and function. *Int J Mol Sci* 14: 6259-6305

456 Bloise E, Ciarmela P, Dela Cruz C, Luisi S, Petraglia F, Reis FM (2019) Activin A  
457 in Mammalian Physiology. *Physiol Rev* 99: 739-780

458 Bradford JR, Farren M, Powell SJ, Runswick S, Weston SL, Brown H, Delpuech  
459 O, Wappett M, Smith NR, Carr TH *et al* (2013) RNA-Seq Differentiates Tumour  
460 and Host mRNA Expression Changes Induced by Treatment of Human Tumour  
461 Xenografts with the VEGFR Tyrosine Kinase Inhibitor Cediranib. *PLOS ONE* 8:  
462 e66003

463 Burdick MM, Henson KA, Delgadillo LF, Choi YE, Goetz DJ, Tees DF, Benencia  
464 F (2012) Expression of E-selectin ligands on circulating tumor cells:  
465 cross-regulation with cancer stem cell regulatory pathways? *Front Oncol* 2: 103

466 Butler A, Hoffman P, Smibert P, Papalexi E, Satija R (2018) Integrating  
467 single-cell transcriptomic data across different conditions, technologies, and  
468 species. *Nat Biotechnol* 36: 411-420

469 Callari M, Batra AS, Batra RN, Sammut S-J, Greenwood W, Clifford H, Hercus C,  
470 Chin S-F, Bruna A, Rueda OM *et al* (2018) Computational approach to  
471 discriminate human and mouse sequences in patient-derived tumour xenografts.  
472 *BMC Genomics* 19: 19-19

473 Chai D, Li K, Du H, Yang S, Yang R, Xu Y, Lian X (2019)  $\beta$ 2-microglobulin has a  
474 different regulatory molecular mechanism between ER(+) and ER(-) breast  
475 cancer with HER2(). *BMC Cancer* 19: 223

476 Cheng Q, Chang JT, Geradts J, Neckers LM, Haystead T, Spector NL, Lyerly  
477 HK (2012) Amplification and high-level expression of heat shock protein 90  
478 marks aggressive phenotypes of human epidermal growth factor receptor 2  
479 negative breast cancer. *Breast Cancer Res* 14: R62

480 Choudhry H, Harris AL (2018) Advances in Hypoxia-Inducible Factor Biology.  
481 *Cell Metab* 27: 281-298

482 Civita P, Franceschi S, Aretini P, Ortenzi V, Menicagli M, Lessi F, Pasqualetti F,  
483 Naccarato AG, Mazzanti CM (2019) Laser Capture Microdissection and  
484 RNA-Seq Analysis: High Sensitivity Approaches to Explain Histopathological  
485 Heterogeneity in Human Glioblastoma FFPE Archived Tissues. *Front Oncol* 9:  
486 482

487 Curtis C, Shah SP, Chin SF, Turashvili G, Rueda OM, Dunning MJ, Speed D,  
488 Lynch AG, Samarajiwa S, Yuan Y *et al* (2012) The genomic and transcriptomic  
489 architecture of 2,000 breast tumours reveals novel subgroups. *Nature* 486:  
490 346-352

491 Ebright RY, Lee S, Wittner BS, Niederhoffer KL, Nicholson BT, Bardia A,  
492 Truesdell S, Wiley DF, Wesley B, Li S *et al* (2020) Deregulation of ribosomal  
493 protein expression and translation promotes breast cancer metastasis. *Science*  
494 367: 1468-1473

495 Echeverria GV, Powell E, Seth S, Ge Z, Carugo A, Bristow C, Peoples M,  
496 Robinson F, Qiu H, Shao J *et al* (2018) High-resolution clonal mapping of  
497 multi-organ metastasis in triple negative breast cancer. *Nat Commun* 9: 5079

498 Fan Y, Si W, Ji W, Wang Z, Gao Z, Tian R, Song W, Zhang H, Niu R, Zhang F  
499 (2019) Rack1 mediates tyrosine phosphorylation of Anxa2 by Src and promotes  
500 invasion and metastasis in drug-resistant breast cancer cells. *Breast Cancer*  
501 *Res* 21: 66

502 Gibbs LD, Vishwanatha JK (2018) Prognostic impact of AnxA1 and AnxA2 gene  
503 expression in triple-negative breast cancer. *Oncotarget* 9: 2697-2704

504 Giuliano AE, Hunt KK, Ballman KV, Beitsch PD, Whitworth PW, Blumencranz  
505 PW, Leitch AM, Saha S, McCall LM, Morrow M (2011) Axillary dissection vs no  
506 axillary dissection in women with invasive breast cancer and sentinel node  
507 metastasis: a randomized clinical trial. *Jama* 305: 569-575

508 Grindheim AK, Saraste J, Vedeler A (2017) Protein phosphorylation and its role  
509 in the regulation of Annexin A2 function. *Biochim Biophys Acta, Gen Subj* 1861:  
510 2515-2529

511 Gu Z, Eils R, Schlesner M (2016) Complex heatmaps reveal patterns and  
512 correlations in multidimensional genomic data. *Bioinformatics* 32: 2847-2849

513 Gu Z, Gu L, Eils R, Schlesner M, Brors B (2014) circlize implements and  
514 enhances circular visualization in R. *Bioinformatics* 30: 2811-2812

515 Han Y, Nakayama J, Hayashi Y, Jeong S, Futakuchi M, Ito E, Watanabe S,  
516 Semba K (2020) Establishment and characterization of highly osteolytic luminal  
517 breast cancer cell lines by intracaudal arterial injection. *Genes Cells* 25: 111-123

518 Huang R, Huang D, Dai W, Yang F (2015) Overexpression of HMGA1 correlates  
519 with the malignant status and prognosis of breast cancer. *Mol Cell Biochem* 404:  
520 251-257

521 Jung EJ, Moon HG, Cho BI, Jeong CY, Joo YT, Lee YJ, Hong SC, Choi SK, Ha  
522 WS, Kim JW *et al* (2007) Galectin-1 expression in cancer-associated stromal  
523 cells correlates tumor invasiveness and tumor progression in breast cancer. *Int J*  
524 *Cancer* 120: 2331-2338

525 Kalli M, Mpekris F, Wong CK, Panagi M, Ozturk S, Thiagalingam S,  
526 Stylianopoulos T, Papageorgis P (2019) Activin A Signaling Regulates IL13R $\alpha$ 2  
527 Expression to Promote Breast Cancer Metastasis. *Front Oncol* 9: 32

528 Karaayvaz M, Cristea S, Gillespie SM, Patel AP, Mylvaganam R, Luo CC,  
529 Specht MC, Bernstein BE, Michor F, Ellisen LW (2018) Unravelling subclonal  
530 heterogeneity and aggressive disease states in TNBC through single-cell  
531 RNA-seq. *Nat Commun* 9: 3588

532 Kim D, Paggi JM, Park C, Bennett C, Salzberg SL (2019) Graph-based genome  
533 alignment and genotyping with HISAT2 and HISAT-genotype. *Nat Biotechnol* 37:  
534 907-915

535 Kuroiwa Y, Nakayama J, Adachi C, Inoue T, Watanabe S, Semba K (2020)  
536 Proliferative Classification of Intracranially Injected HER2-positive Breast  
537 Cancer Cell Lines. *Cancers (Basel)* 12: 1811

538 Lee CC, Ding X, Zhao T, Wu L, Perkins S, Du H, Yan C (2019) Transthyretin  
539 Stimulates Tumor Growth through Regulation of Tumor, Immune, and  
540 Endothelial Cells. *J Immunol* 202: 991-1002

541 Li B, Dewey CN (2011) RSEM: accurate transcript quantification from RNA-Seq  
542 data with or without a reference genome. *BMC Bioinformatics* 12: 323

543 Liu H, Patel MR, Prescher JA, Patsialou A, Qian D, Lin J, Wen S, Chang YF,  
544 Bachmann MH, Shimono Y *et al* (2010) Cancer stem cells from human breast  
545 tumors are involved in spontaneous metastases in orthotopic mouse models.  
546 *Proc Natl Acad Sci U S A* 107: 18115-18120

547 Marotta LL, Almendro V, Marusyk A, Shipitsin M, Schemme J, Walker SR,  
548 Bloushtain-Qimron N, Kim JJ, Choudhury SA, Maruyama R *et al* (2011) The  
549 JAK2/STAT3 signaling pathway is required for growth of CD44<sup>+</sup>CD24<sup>-</sup> stem  
550 cell-like breast cancer cells in human tumors. *J Clin Invest* 121: 2723-2735

551 McGranahan N, Swanton C (2017) Clonal Heterogeneity and Tumor Evolution:  
552 Past, Present, and the Future. *Cell* 168: 613-628

553 Murakami A, Maekawa M, Kawai K, Nakayama J, Araki N, Semba K, Taguchi T,  
554 Kamei Y, Takada Y, Higashiyama S (2019) Cullin-3/KCTD10 E3 complex is  
555 essential for Rac1 activation through RhoB degradation in human epidermal  
556 growth factor receptor 2-positive breast cancer cells. *Cancer Sci* 110: 650-661

557 Mylona E, Giannopoulou I, Fasomytakis E, Nomikos A, Magkou C, Bakarakos P,  
558 Nakopoulou L (2008) The clinicopathologic and prognostic significance of



559 CD44+/CD24(-/low) and CD44-/CD24+ tumor cells in invasive breast  
560 carcinomas. *Hum Pathol*39: 1096-1102

561 Nakayama J, Han Y, Kuroiwa Y, Azuma K, Yamamoto Y, Semba K (2021) The  
562 In Vivo Selection Method in Breast Cancer Metastasis. *Int J Mol Sci*22

563 Nakayama J, Ito E, Fujimoto J, Watanabe S, Semba K (2017) Comparative  
564 analysis of gene regulatory networks of highly metastatic breast cancer cells  
565 established by orthotopic transplantation and intra-circulation injection. *Int J*  
566 *Oncol*50: 497-504

567 Nakayama J, Saito R, Hayashi Y, Kitada N, Tamaki S, Han Y, Semba K, Maki  
568 SA (2020) High Sensitivity In Vivo Imaging of Cancer Metastasis Using a  
569 Near-Infrared Luciferin Analogue seMpai. *Int J Mol Sci*21

570 Nishiyama K, Maekawa M, Nakagita T, Nakayama J, Kiyoi T, Chosei M,  
571 Murakami A, Kamei Y, Takeda H, Takada Y *et al* (2021) CNKSR1 serves as a  
572 scaffold to activate an EGFR phosphatase via exclusive interaction with  
573 RhoB-GTP. *Life Sci Alliance* 4

- 574 Obenauf AC, Massague J (2015) Surviving at a Distance: Organ-Specific  
575 Metastasis. *Trends Cancer* 1: 76-91
- 576 Oskarsson T, Batlle E, Massagué J (2014) Metastatic Stem Cells: Sources,  
577 Niches, and Vital Pathways. *Cell Stem Cell* 14: 306-321
- 578 Pegoraro S, Ros G, Piazza S, Sommaggio R, Ciani Y, Rosato A, Sgarra R, Del  
579 Sal G, Manfioletti G (2013) HMGA1 promotes metastatic processes in basal-like  
580 breast cancer regulating EMT and stemness. *Oncotarget* 4: 1293-1308
- 581 Pereira B, Chin S-F, Rueda OM, Vollan H-KM, Provenzano E, Bardwell HA,  
582 Pugh M, Jones L, Russell R, Sammut S-J *et al* (2016) The somatic mutation  
583 profiles of 2,433 breast cancers refine their genomic and transcriptomic  
584 landscapes. *Nat Commun* 7: 11479
- 585 Petrova V, Annicchiarico-Petruzzelli M, Melino G, Amelio I (2018) The hypoxic  
586 tumour microenvironment. *Oncogenesis* 7: 10
- 587 Popat S, Grohé C, Corral J, Reck M, Novello S, Gottfried M, Radonjic D, Kaiser  
588 R (2020) Anti-angiogenic agents in the age of resistance to immune checkpoint

589 inhibitors: Do they have a role in non-oncogene-addicted non-small cell lung  
590 cancer? *Lung Cancer* 144: 76-84

591 Robinson DR, Wu YM, Lonigro RJ, Vats P, Cobain E, Everett J, Cao X, Rabban  
592 E, Kumar-Sinha C, Raymond V *et al* (2017) Integrative clinical genomics of  
593 metastatic cancer. *Nature* 548: 297-303

594 Rodriques SG, Stickels RR, Goeva A, Martin CA, Murray E, Vanderburg CR,  
595 Welch J, Chen LM, Chen F, Macosko EZ (2019) Slide-seq: A scalable  
596 technology for measuring genome-wide expression at high spatial resolution.  
597 *Science* 363: 1463-1467

598 Santos TG, Martins VR, Hajj GNM (2017) Unconventional Secretion of Heat  
599 Shock Proteins in Cancer. *Int J Mol Sci* 18

600 Shah SN, Cope L, Poh W, Belton A, Roy S, Talbot CC, Jr., Sukumar S, Huso DL,  
601 Resar LM (2013) HMGA1: a master regulator of tumor progression in  
602 triple-negative breast cancer cells. *PLoS One* 8: e63419

603 Sharma MC, Jain D (2020) Important role of annexin A2 (ANXA2) in new blood  
604 vessel development in vivo and human triple negative breast cancer (TNBC)  
605 growth. *Exp Mol Pathol* 116: 104523

606 Sheridan C, Kishimoto H, Fuchs RK, Mehrotra S, Bhat-Nakshatri P, Turner CH,  
607 Goulet R, Jr., Badve S, Nakshatri H (2006) CD44+/CD24- breast cancer cells  
608 exhibit enhanced invasive properties: an early step necessary for metastasis.  
609 *Breast Cancer Res* 8: R59

610 Stuart T, Butler A, Hoffman P, Hafemeister C, Papalexi E, Mauck WM, 3rd, Hao  
611 Y, Stoeckius M, Smibert P, Satija R (2019) Comprehensive Integration of  
612 Single-Cell Data. *Cell* 177: 1888-1902.e1821

613 Wang H, Wang L, Song Y, Wang S, Huang X, Xuan Q, Kang X, Zhang Q (2017)  
614 CD44(+)/CD24(-) phenotype predicts a poor prognosis in triple-negative breast  
615 cancer. *Oncol Lett* 14: 5890-5898

616 Watanabe N, Nakayama J, Fujita Y, Mori Y, Kadota T, Shimomura I, Ohtsuka T,  
617 Okamoto K, Araya J, Kuwano K *et al* (2020) Single-cell Transcriptome Analysis  
618 Reveals an Anomalous Epithelial Variation and Ectopic Inflammatory Response

619 in Chronic Obstructive Pulmonary Disease. *medRxiv*.

620 2020.2012.2003.20242412

621 Wu SZ, Al-Eryani G, Roden DL, Junankar S, Harvey K, Andersson A,

622 Thennavan A, Wang C, Torpy JR, Bartonicek N *et al* (2021) A single-cell and

623 spatially resolved atlas of human breast cancers. *Nat Genet* 53: 1334-1347

624 Yates LR, Knappskog S, Wedge D, Farmery JHR, Gonzalez S, Martincorena I,

625 Alexandrov LB, Van Loo P, Haugland HK, Lilleng PK *et al* (2017) Genomic

626 Evolution of Breast Cancer Metastasis and Relapse. *Cancer Cell* 32: 169-184

627 Yoda T, Hosokawa M, Takahashi K, Sakanashi C, Takeyama H, Kambara H

628 (2017) Site-specific gene expression analysis using an automated tissue

629 micro-dissection punching system. *Sci Rep* 7: 4325

630 Zhang X, Ren D, Guo L, Wang L, Wu S, Lin C, Ye L, Zhu J, Li J, Song L *et al*

631 (2017) Thymosin beta 10 is a key regulator of tumorigenesis and metastasis and

632 a novel serum marker in breast cancer. *Breast Cancer Res* 19: 15

633 Zhang Y, Bi J, Zhu H, Shi M, Zeng X (2018) ANXA2 could act as a moderator of  
634 EGFR-directed therapy resistance in triple negative breast cancer. *Biosci*  
635 *Biotechnol Biochem* 82: 1733-1741

636 Zhou Y, Zhou B, Pache L, Chang M, Khodabakhshi AH, Tanaseichuk O, Benner  
637 C, Chanda SK (2019) Metascape provides a biologist-oriented resource for the  
638 analysis of systems-level datasets. *Nat Commun* 10: 1523

639

640

641 **Figure Legends**

642 **Figure 1. Microtissue sectioning from the primary tumors and the axillary lymph**  
643 **node metastases in the TNBC xenograft model.**

644 (A) Experimental flowchart of spatial transcriptomics. The human TNBC cell line  
645 MDA-MB-231-Parent-Venus was transplanted orthotopically into a female NOD-SCID  
646 mouse. After 8 weeks, the primary tumor was harvested, and the center of the tumor  
647 was sectioned. After 4 weeks, axially lymph node metastases were harvested and  
648 sectioned from the same mouse. Sectioning was performed by an automated tissue  
649 microdissection punching system with a 100  $\mu$ m needle. (B) In total, 93 microspots were  
650 sectioned from the primary tumor, and 43 microspots were sectioned from axillary  
651 lymph node metastases. RNA was extracted from a total of 137 spots. (C) A flowchart of  
652 the transcriptome analysis. Quality check was performed by FASTQC. The reads were  
653 mapped to the human genome reference and the mouse genome reference by HISAT2.  
654 Protein-coding genes were selected for analysis with Seurat.

655

656 **Figure 2. Transcriptome profiling of the microspots.**

657 (A) UMAP plot of human (cancer cell) spot clustering. (B) UMAP plot of mouse (stromal  
658 cell) spot clustering. (C) Violin plot of cancer marker genes. (D) Violin plot of stromal  
659 marker genes. (E) Heatmap of CD44, HMGA1, and MYC expression in each human  
660 cluster. (F & G) Bar plot of spot counts in the primary tumor and lymph node  
661 metastases: (F) human (G) mouse.

662

663 **Figure 3. Spatial transcriptome with cell cycle detection.**

664 (A) Spatial transcriptomics of human (cancer cell) clusters at the primary tumors and the  
665 lymph node metastases. (B) Cell cycle phase of cancer cells at the primary tumor and  
666 lymph-node metastases. (C) Spatial transcriptomics of mouse (stromal cell) clusters at  
667 the primary tumors and lymph node metastases. (D) Sunburst plot of the cell cycle in  
668 human cancer cell clusters. (E) Bar plot of cell cycle phases in the primary tumors and  
669 lymph node metastases.

670

671 **Figure 4. Enrichment analysis of two cancer stem cell-like populations.**

672 (A) Heatmap of cluster marker genes in human cancer cell DEGs. (B) Heatmap of  
673 enrichment scores in upstream analysis. (C) Heatmap of enrichment analysis in the two  
674 cancer stem cell-like populations (HMGA1-high and CD44/MYC-high). (D) Enrichment  
675 network in two cancer stem cell-like populations.

676

677 **Figure 5. Spot cell-cell interaction analysis in 'stromal to cancer interaction'.**

678 (A) A flowchart of the CCI analysis. (B) Circular clustering plot of hierarchical analysis of  
679 spot CCI analysis (stromal cell to cancer cell). (C & D) Heatmap of CCI in the spots.

680

681 **Figure 6. Cell-cell interaction analysis with cell type combinations.**

682 (A) A table of the combinations of cell types. (B) UMAP plot of the combination group.  
683 (C) Bar plot of counts of the group. (D) Circular bar plot of the top CCI  
684 (cancer-to-stromal cell interaction) in each group. (E) Bubble chart of the



685 cancer-to-stromal CCI in each group. (F) Circular bar plot of the top CCI  
686 (stromal-to-cancer cell interaction) in each group. (G) Bubble chart of the  
687 stromal-to-cancer CCI in each group.

688

689 **Figure 7. Reanalysis of clinical scRNA-seq and cohorts with cancer stem cell-like**  
690 **signatures.**

691 (A) A flowchart of the reanalysis of a public scRNA-seq dataset. We downloaded  
692 GSE118389 (scRNA-seq data of 5 TNBC patients) and analyzed it with Seurat. Log  
693 normalization, scaling, PCA and UMAP visualization were performed following the basic  
694 protocol in Seurat. To extract the cancer cells, cells expressing EPCAM (epithelial  
695 marker) were filtered. (B) UMAP plot of cancer cell from 5 TNBC patients. (C&D)  
696 Module analysis of HMGA1-high signatures and CD44/MYC-high signatures with UMAP  
697 plots. The pie chart showed the ratio of cells that expressed the signatures. (E) Survival  
698 analysis of claudin-low (TNBC) patients in METABRIC cohorts by the Kaplan-Meier  
699 method. Survival analysis with the expression of the HMGA1 signatures.

700

701

702

703 **Supplementary Figure Legends**

704 **Supplementary Figure S1. Read counts and heterogeneity per spot.**

705 (A) Read counts of human and mouse transcripts in each spot. (B) Read counts of  
706 human cancer clusters. (C) Read counts of mouse stromal clusters. (D) Normalized  
707 closeness centrality in each human cancer cluster. (F) Normalized closeness centrality  
708 in each mouse stromal cluster.

709

710 **Supplementary Figure S2. Cell cycle phase in mouse clusters.**

711 (A) The ratio of the cell cycle phase of human cancer clusters. (B) Cell cycle phase of  
712 mouse stromal cells at the primary tumor and lymph-node metastasis. (C) Sunburst plot  
713 of the cell cycle in mouse stromal cell clusters. (D) The ratios of the cell cycle phases of  
714 mouse stromal clusters.

715

716 **Supplementary Figure S3. Enrichment network of two cancer stem cell-like  
717 populations.**

718 (A) Circos plot of DEGs in cancer clusters. The edges showed the overlap of DEGs  
719 between each cluster. (B) Network visualization of p values in enrichment analysis.

720

721 **Supplementary Figure S4. Enrichment analysis of Marker-low clusters.**

722 (A) Heatmap of enrichment analysis in Marker-low clusters. (B) Enrichment network in  
723 Marker-low clusters.

724

725 **Supplementary Figure S5. Enrichment analysis in mouse stromal clusters.**

726 (A) Circos plot of DEGs. The edges showed the overlap of DEGs between each cluster.

727 (B) Heatmap of DEGs in mouse stromal cell. (C) Heatmap of enrichment analysis in

728 Ttr-high, Tcell-like, and Bcell-like clusters (D) Enrichment network in Ttr-high, Tcell-like,

729 and Bcell-like clusters

730

731 **Supplementary Figure S6. Spot Cell-Cell Interaction analysis in ‘cancer to stromal**

732 **interaction’**

733 (A) Circular clustering plot of hierarchical analysis of spot CCI analysis

734 (cancer-to-stromal cell). (B & C) Heatmap of CCI in the interactive spots.

735

736 **Supplementary Figure S7. Survival analysis with the expression of the CD44/MYC**

737 **signatures**

738 Survival analysis of claudin-low patients in METABRIC cohorts by Kaplan-Meier method.

739 Survival analysis with the expression of the CD44/MYC signatures.

740

Figure 1

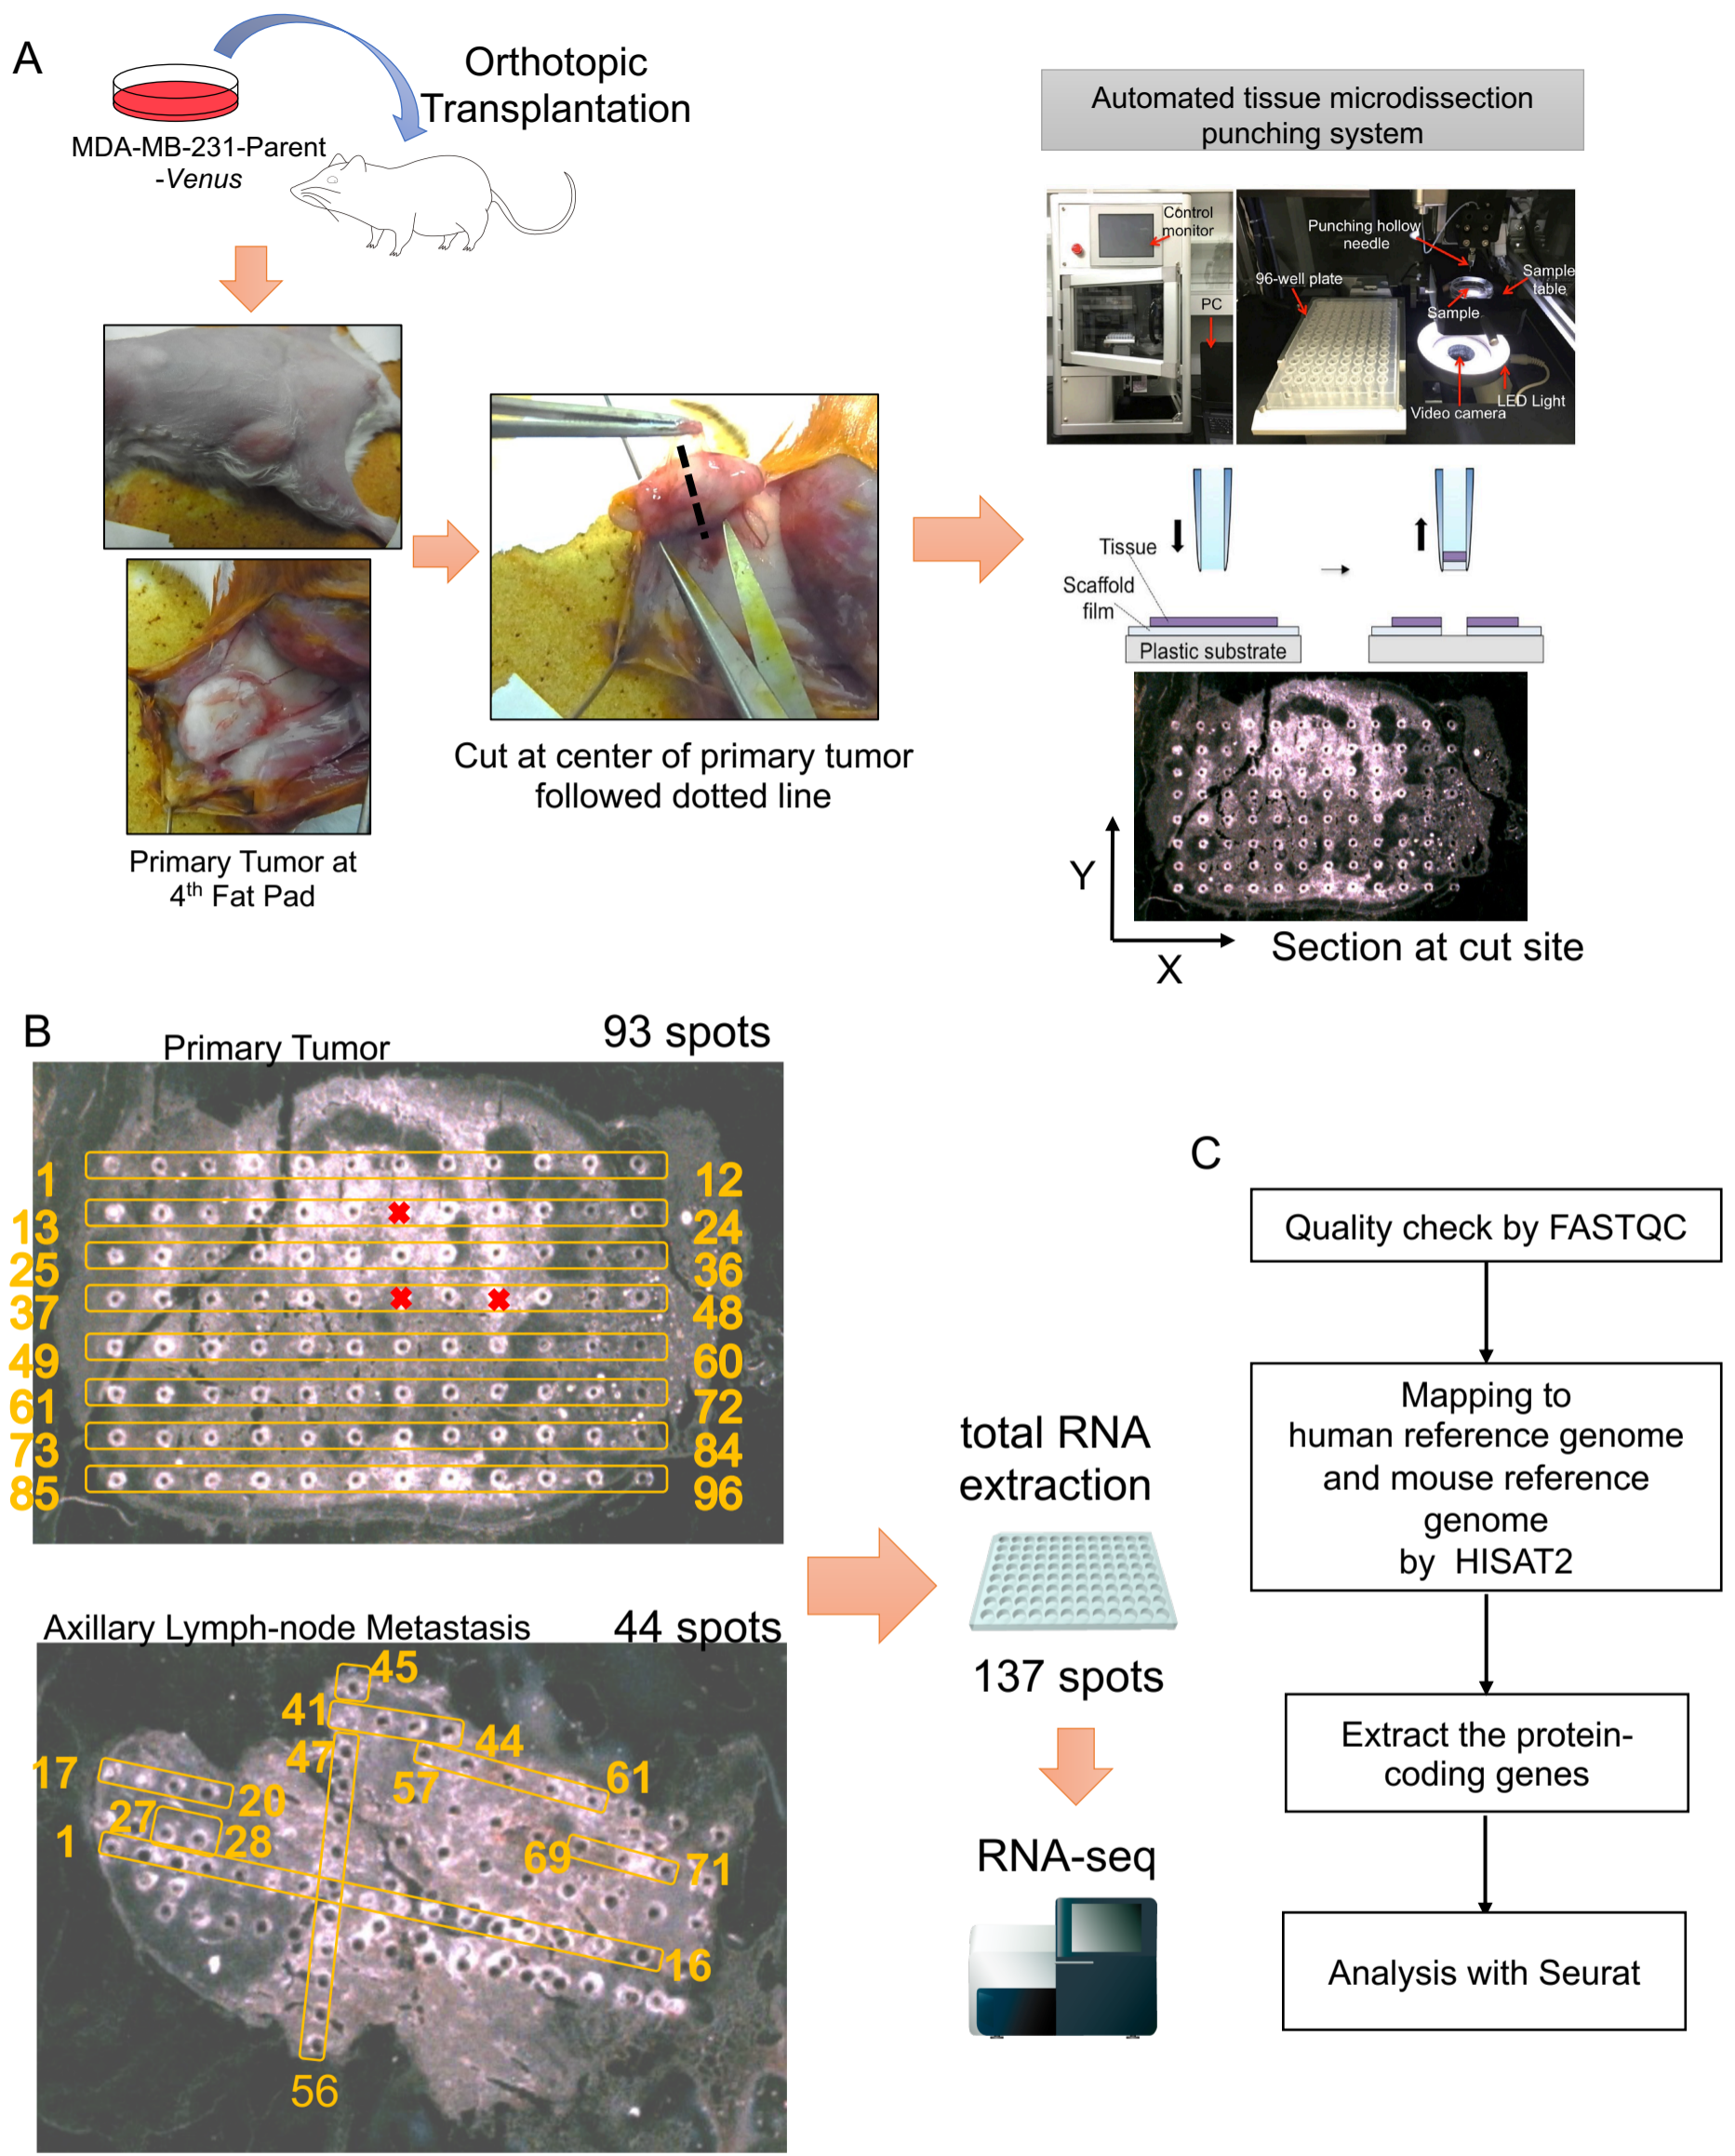

Figure 2

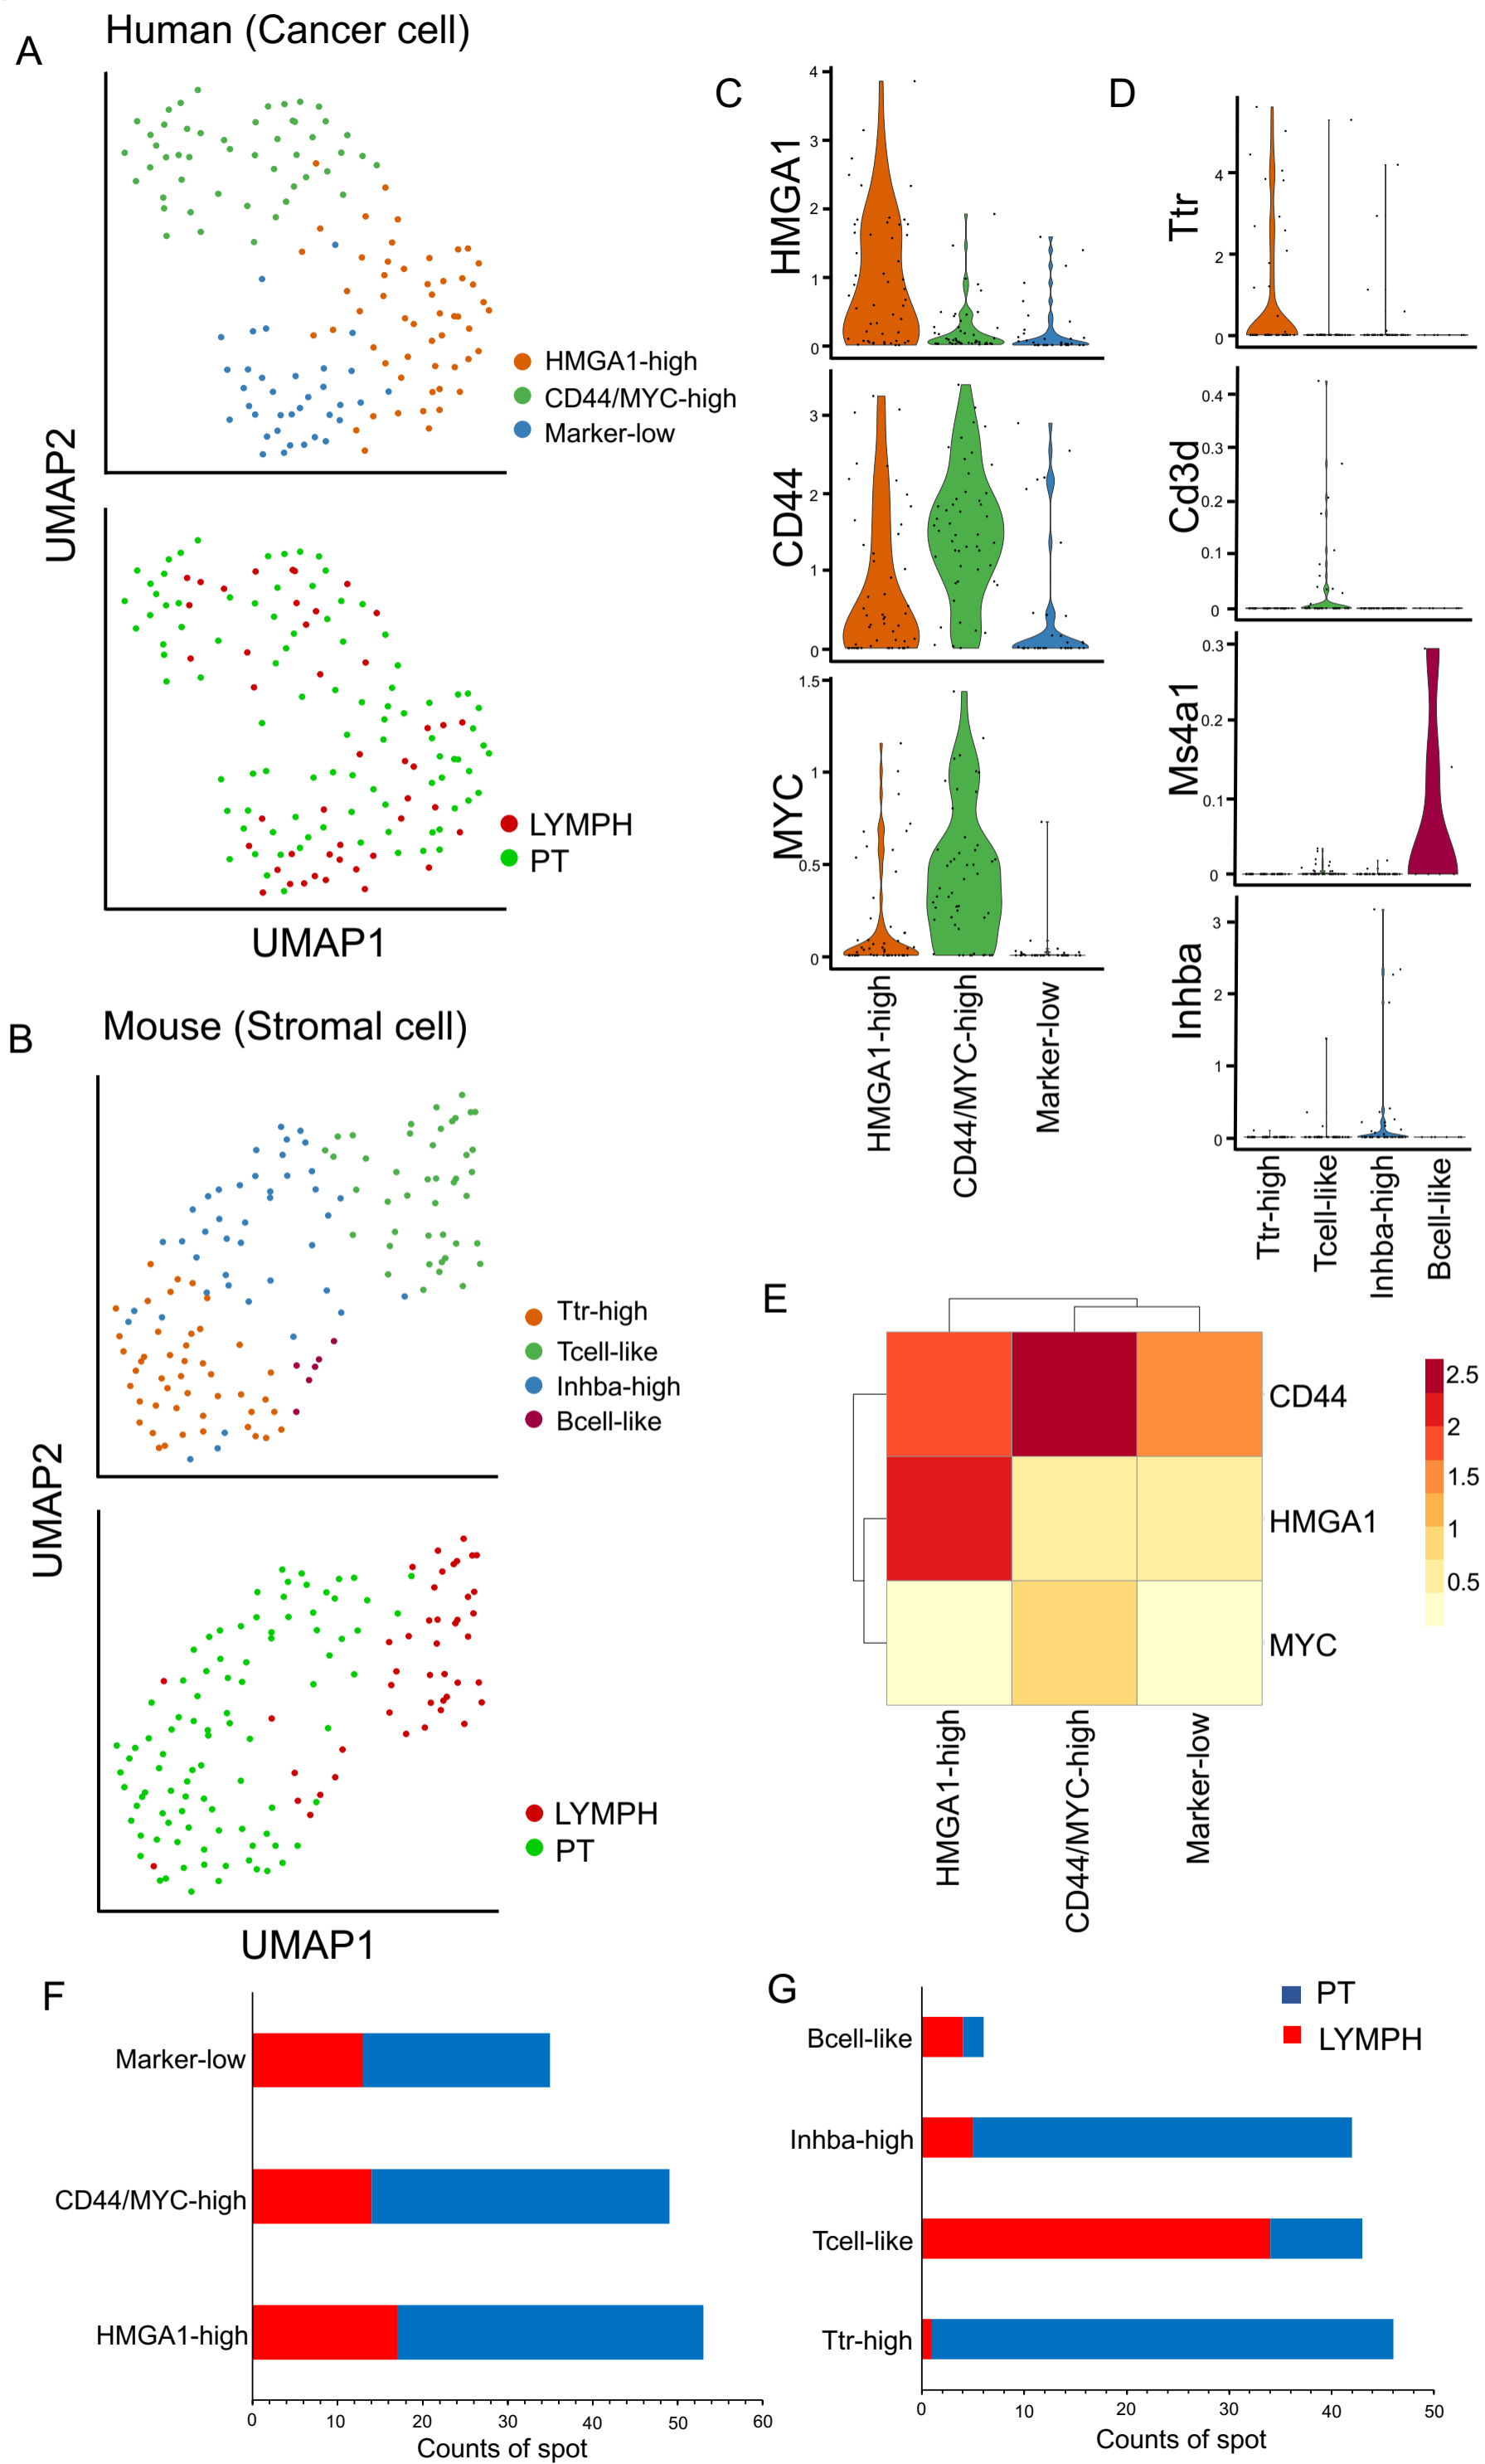



Figure 3

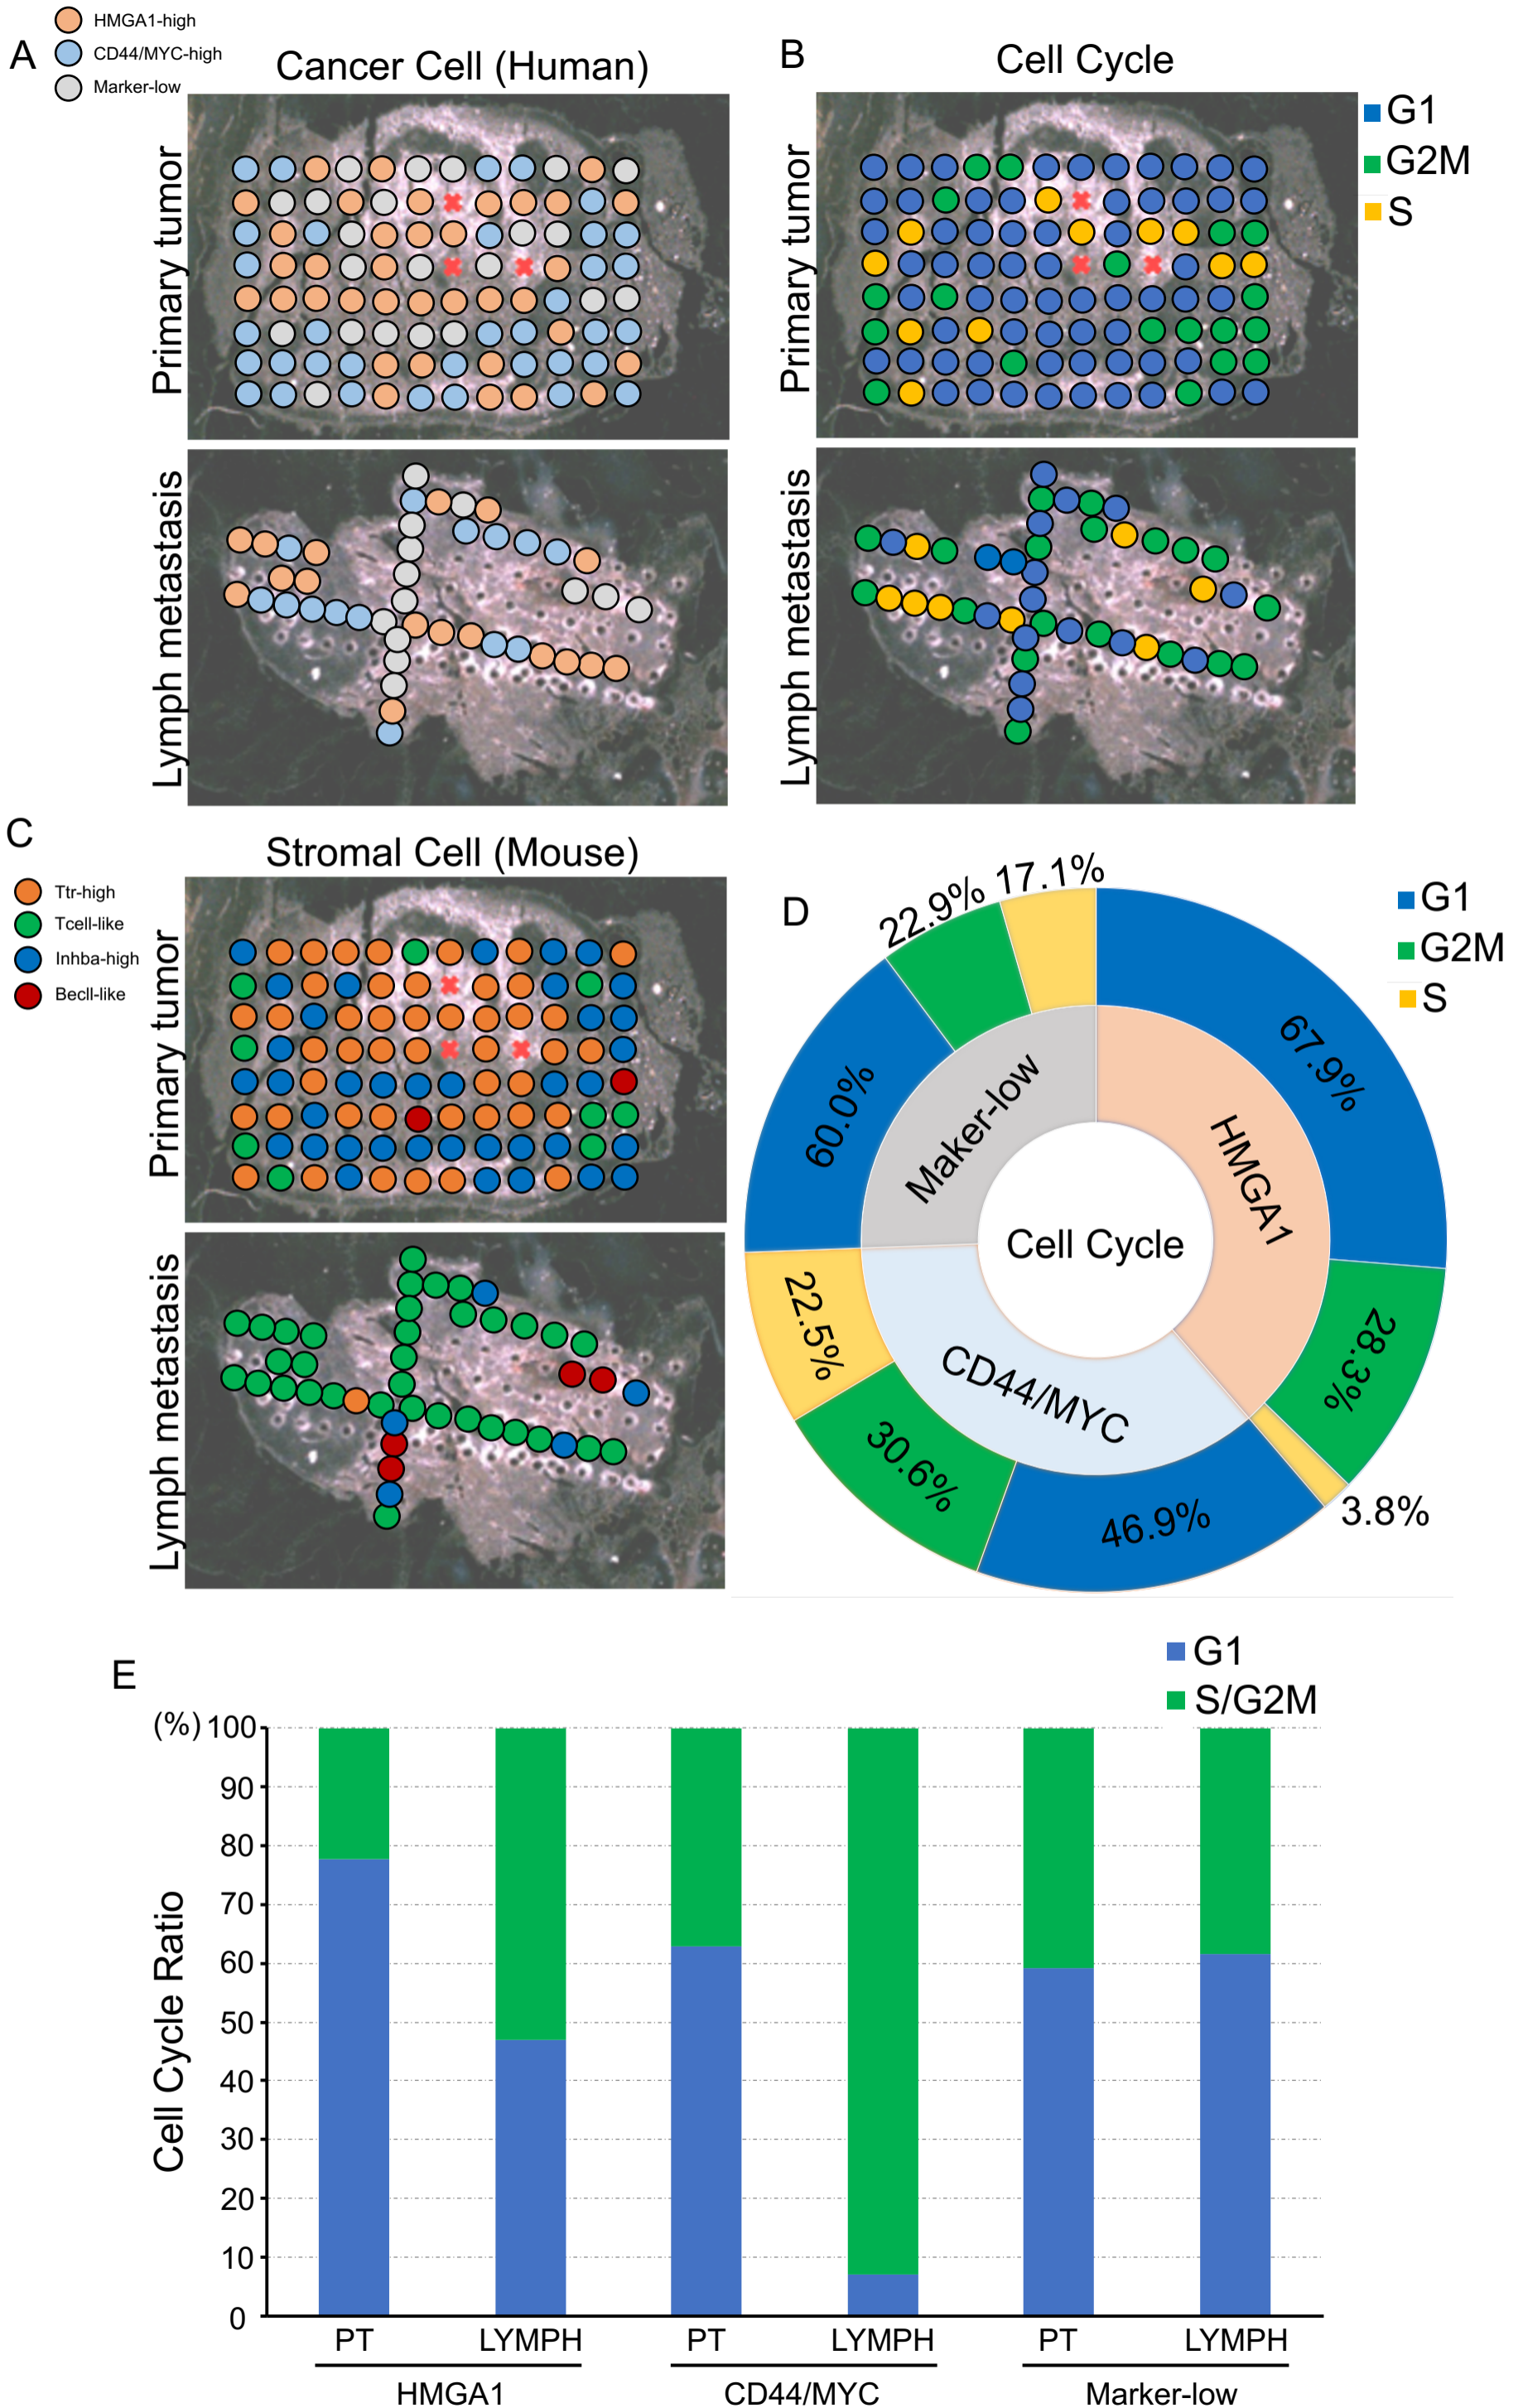



Figure 4

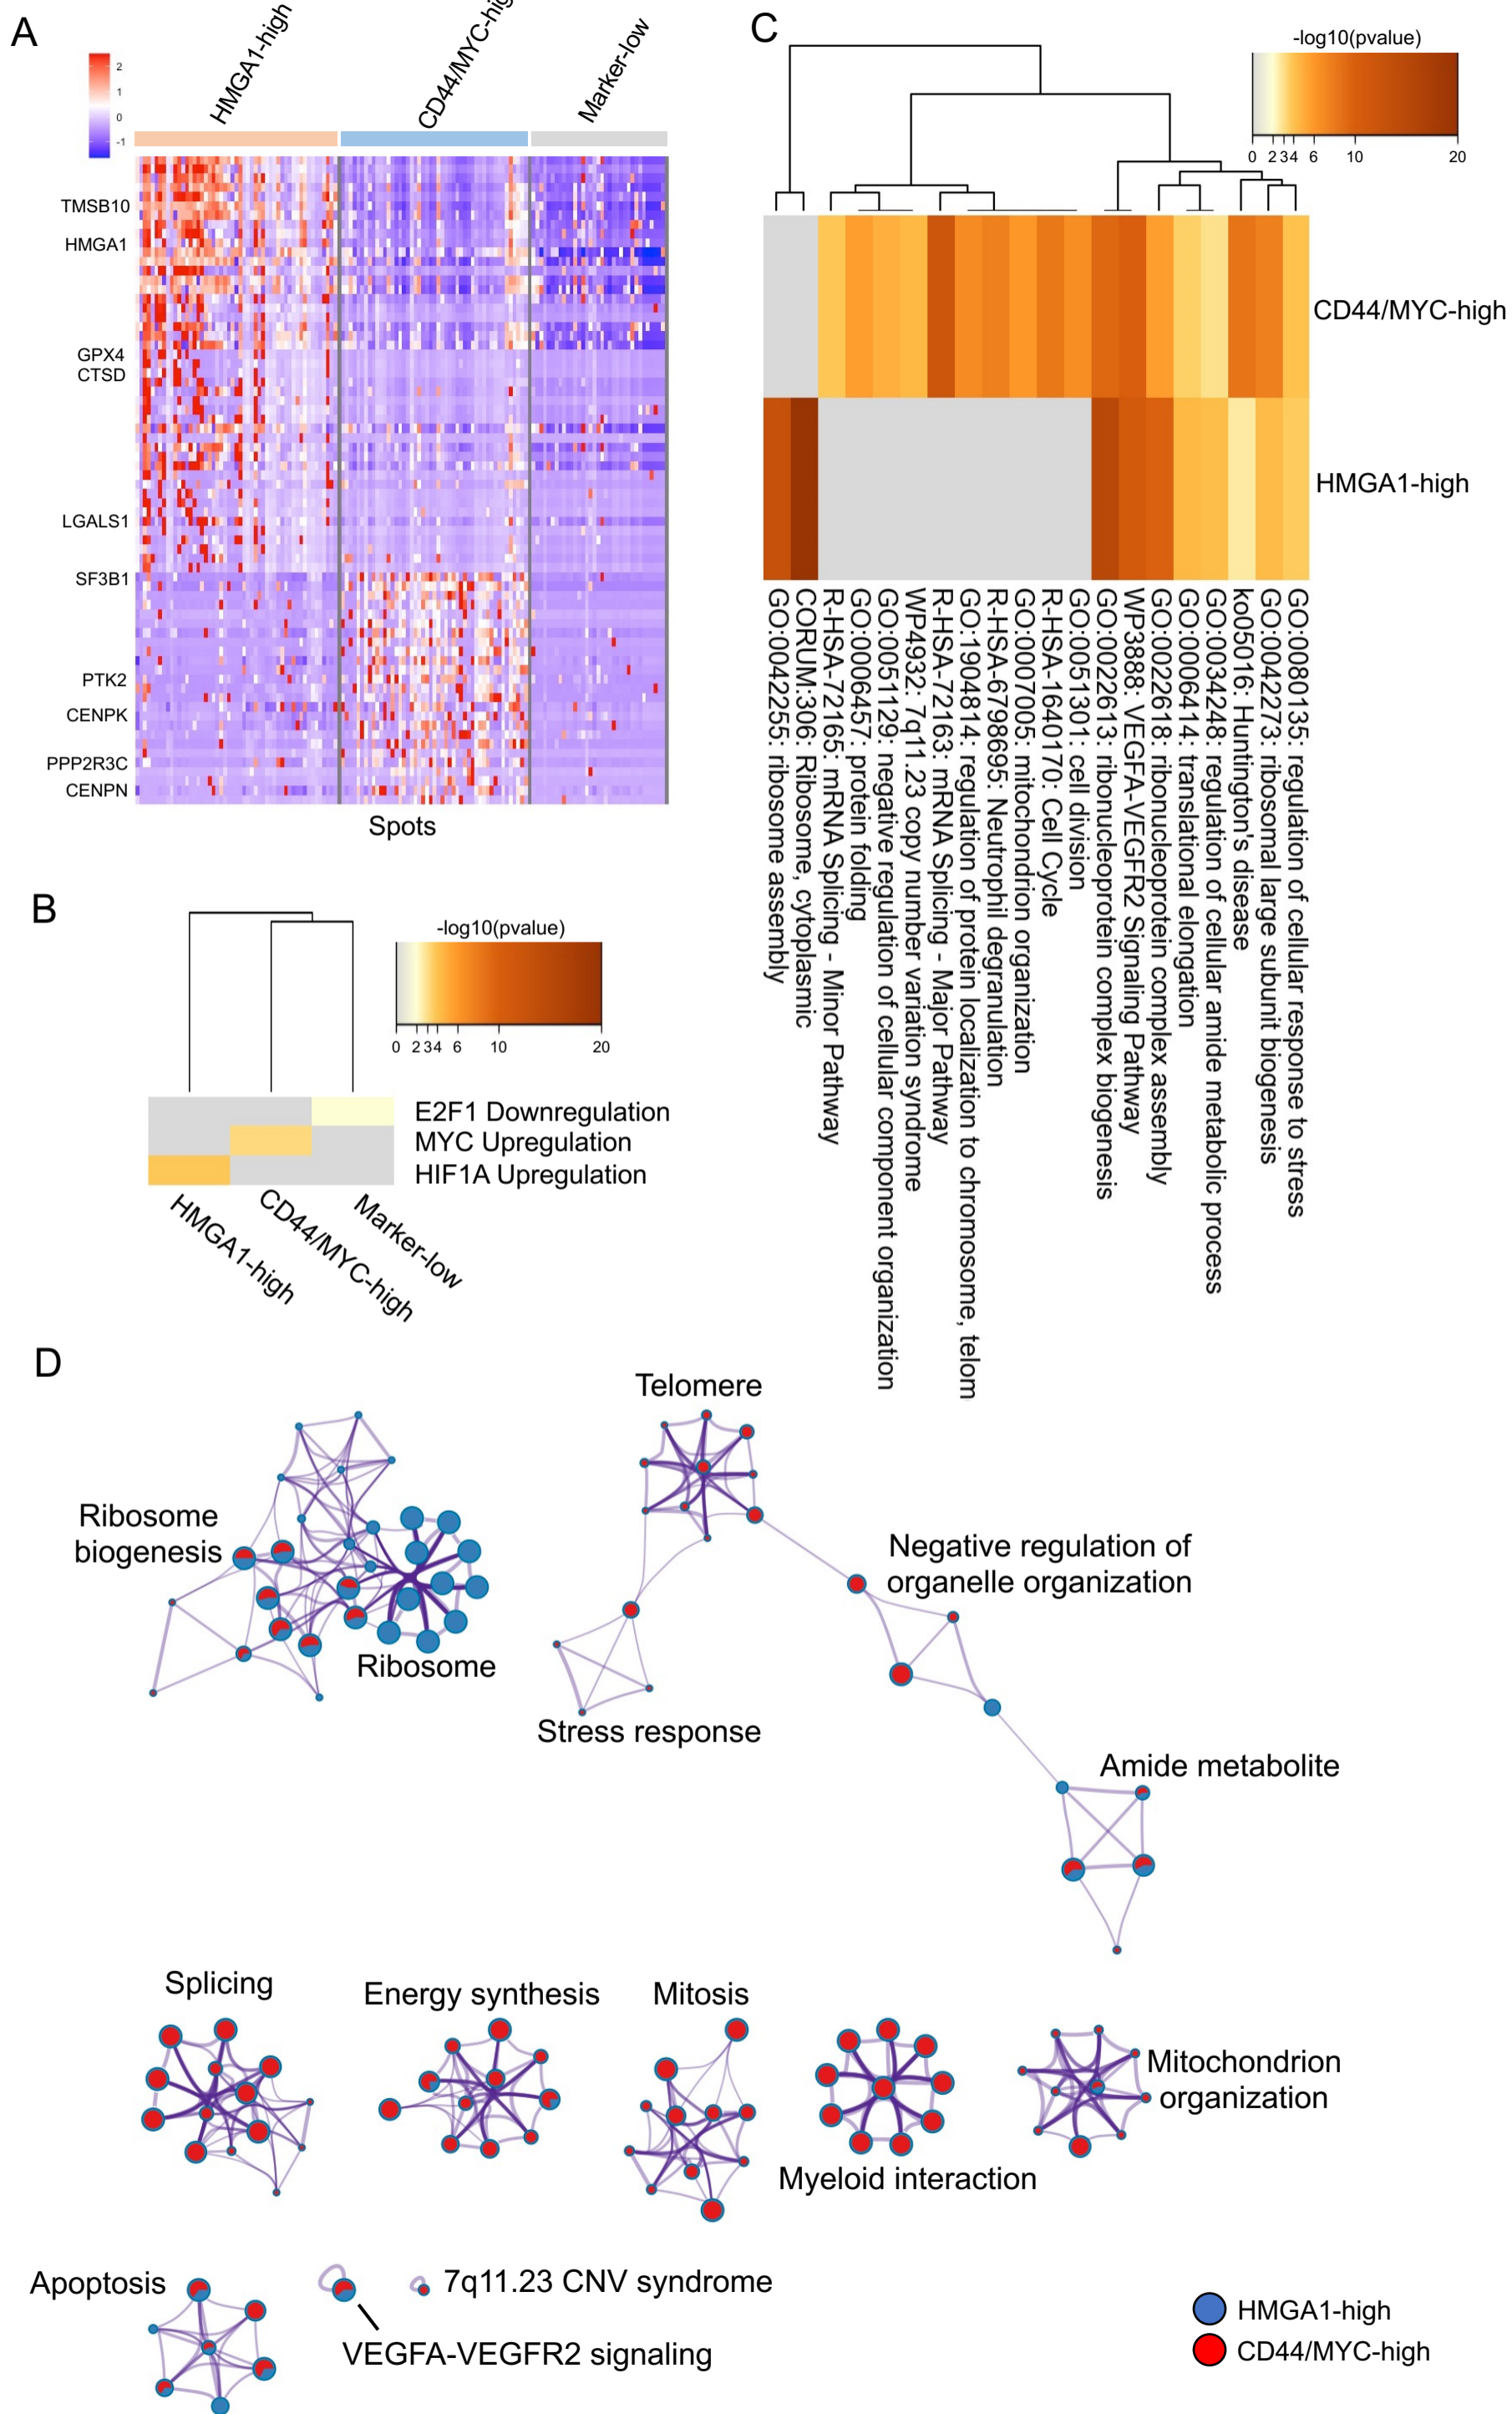

Figure 5

Stromal to Cancer Interaction

**A**

Cell-Cell Interaction Database

3,209 Ligands  
4,364 Receptors  
433 Extracellular Matrix  
Total 115,900 interactions

Choose expressed genes  
Expression > 2

Estimation of  
ligand-receptor interaction  
in the same spot

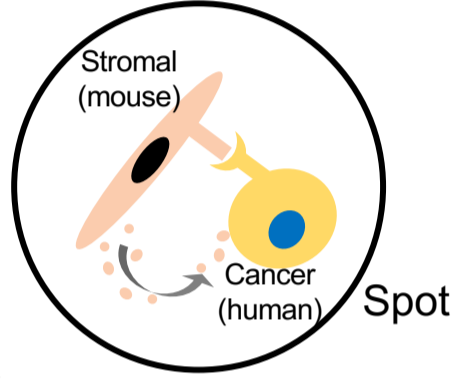

**B**

● LYMPH  
● PT

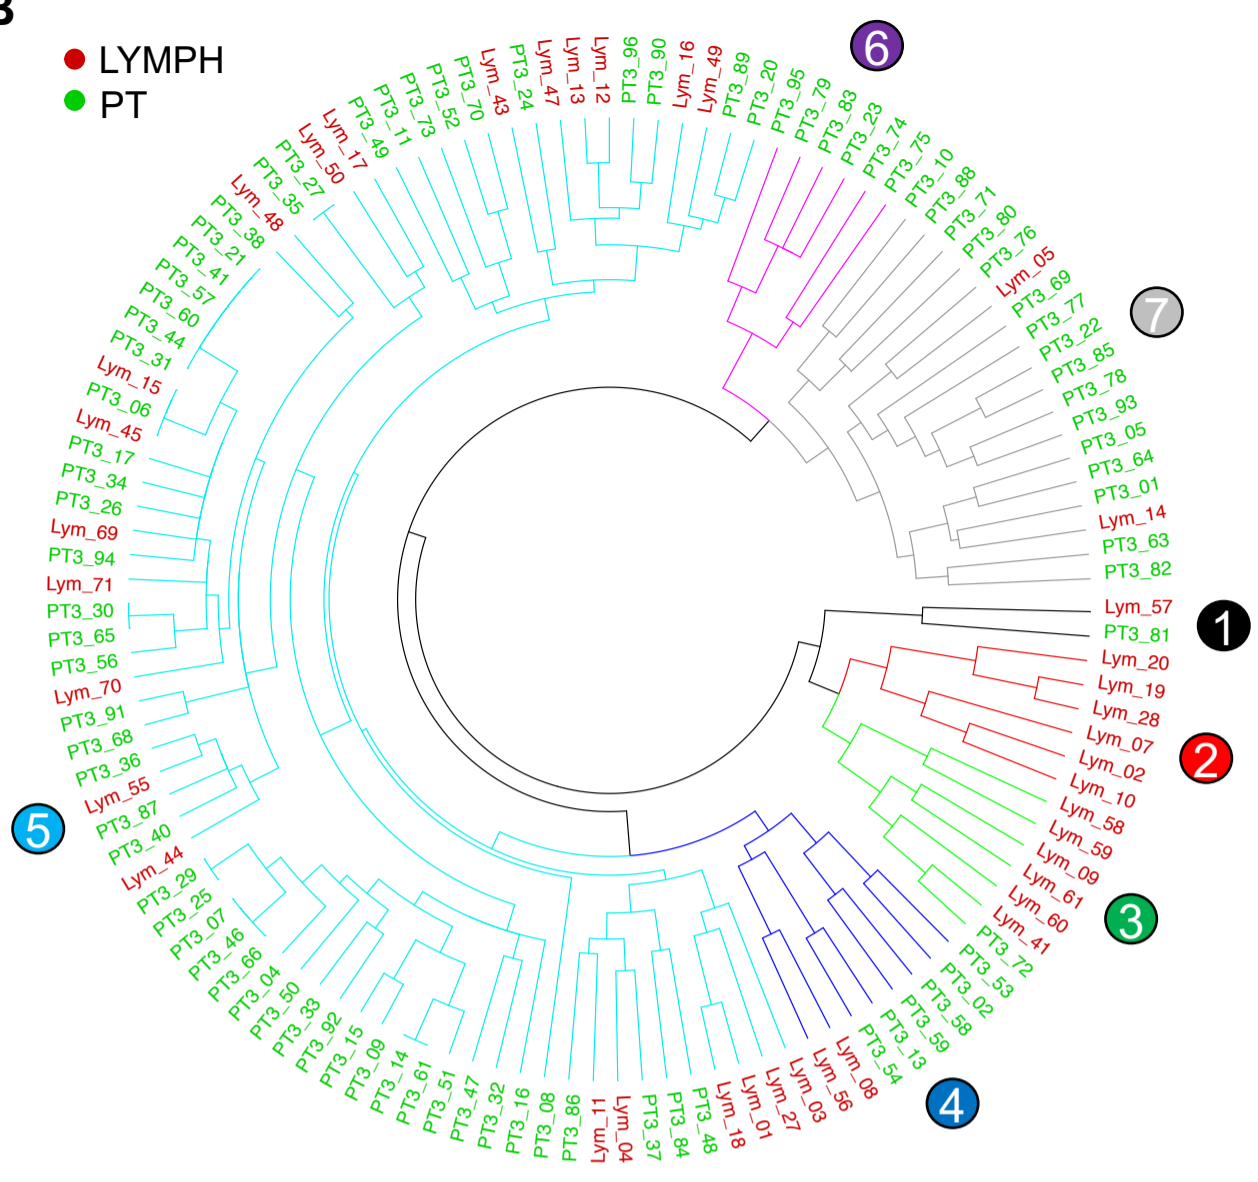

**C**

② Lymph specific interaction

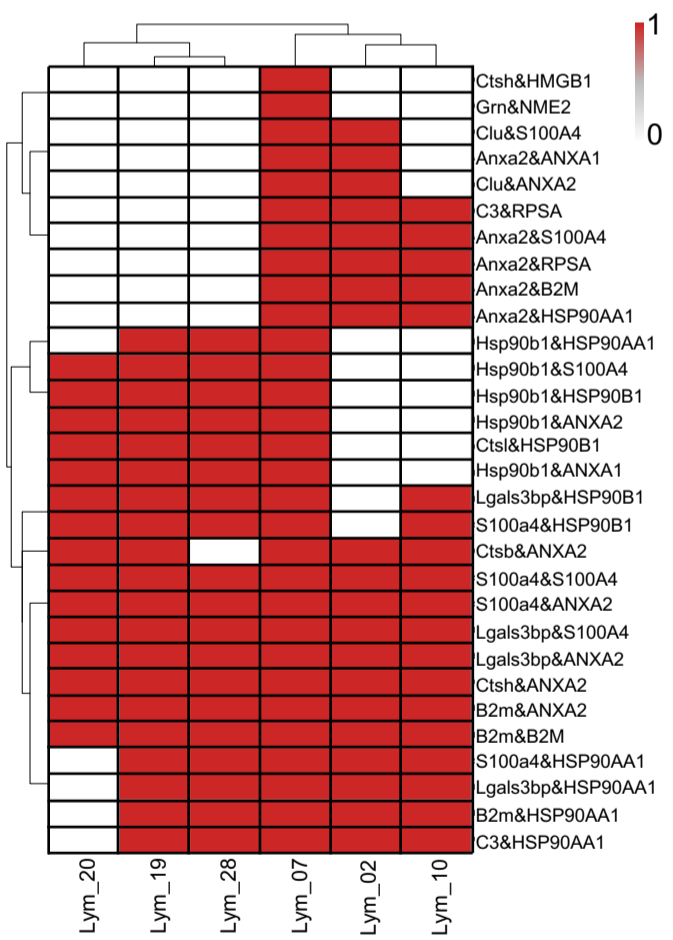

**E**

⑥ Primary tumor specific interaction

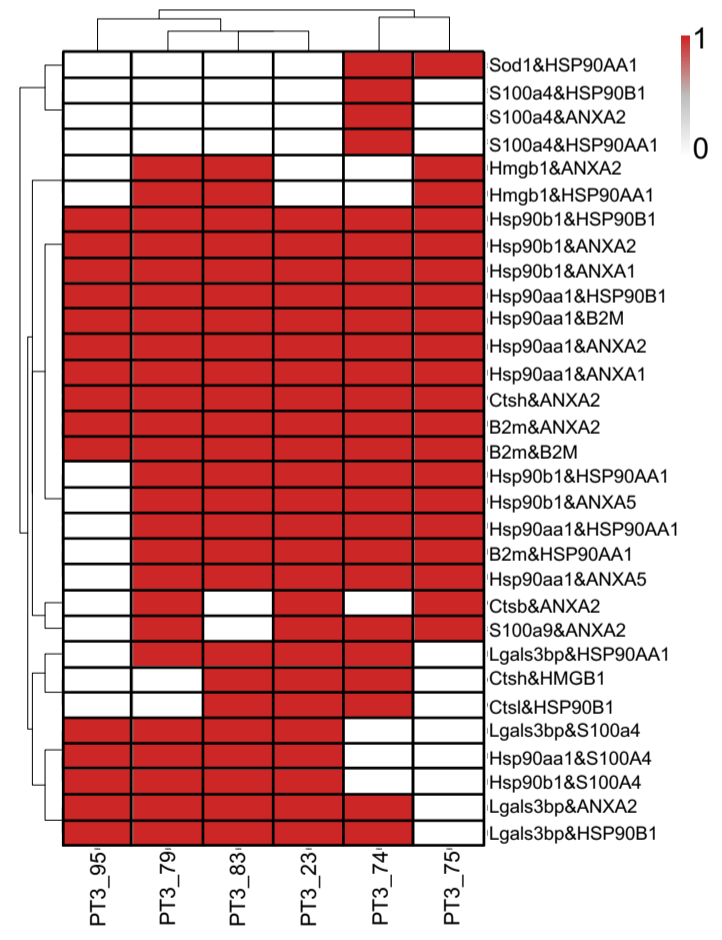

**D**

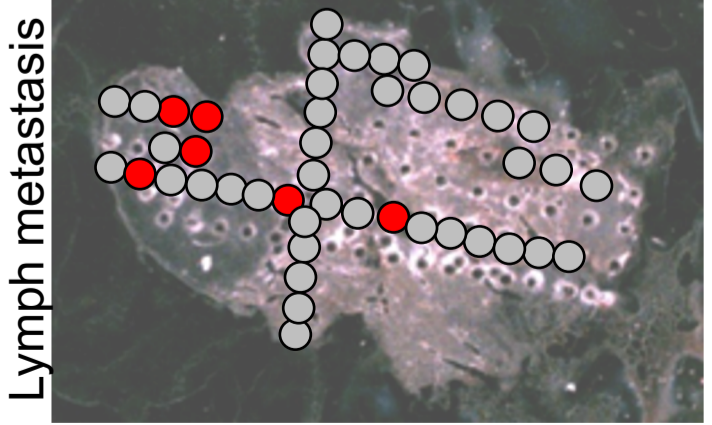

**F**

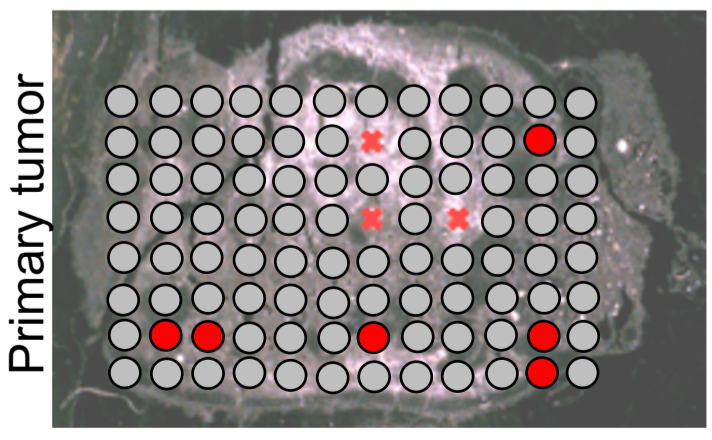



Figure 6

A

|       | PT-1       | PT-2          | PT-3          | Mix-1      | Mix-2      | Mix-3         | Mix-4      | Mix-5      | Mix-6      | Mix-7      |
|-------|------------|---------------|---------------|------------|------------|---------------|------------|------------|------------|------------|
| human | HMGA1-high | CD44/MYC-high | CD44/MYC-high | HMGA1-high | HMGA1-high | CD44/MYC-high | Marker-low | Marker-low | Marker-low | Marker-low |
| mouse | Ttr-high   | Ttr-high      | Inhba-high    | Tcell-like | Inhba-high | Tcell-like    | Ttr-high   | Tcell-like | Inhba-high | Bcell-like |

B Human (Cancer cell)

Mouse (Stromal cell)

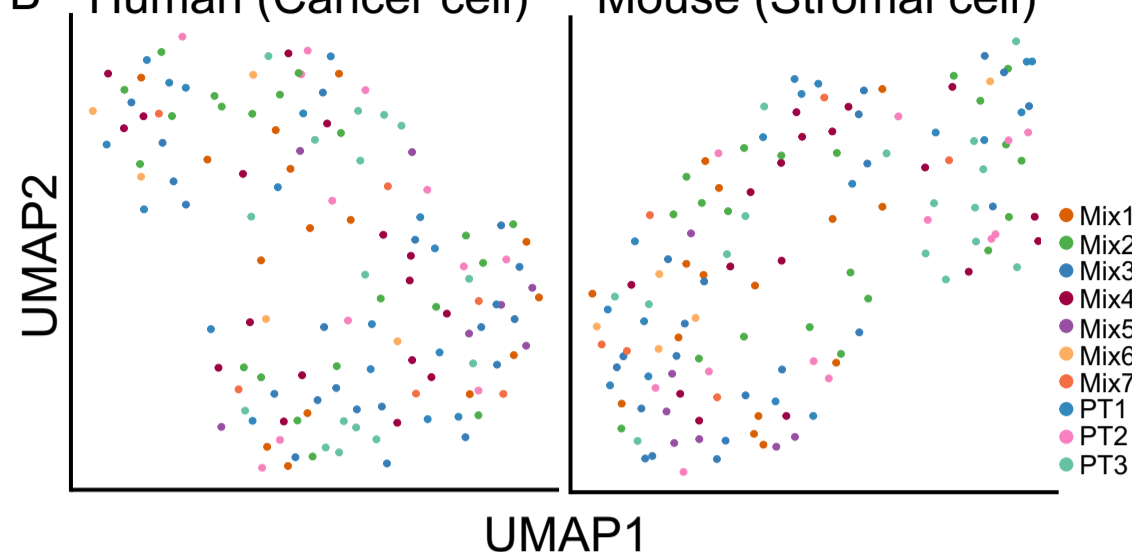

C

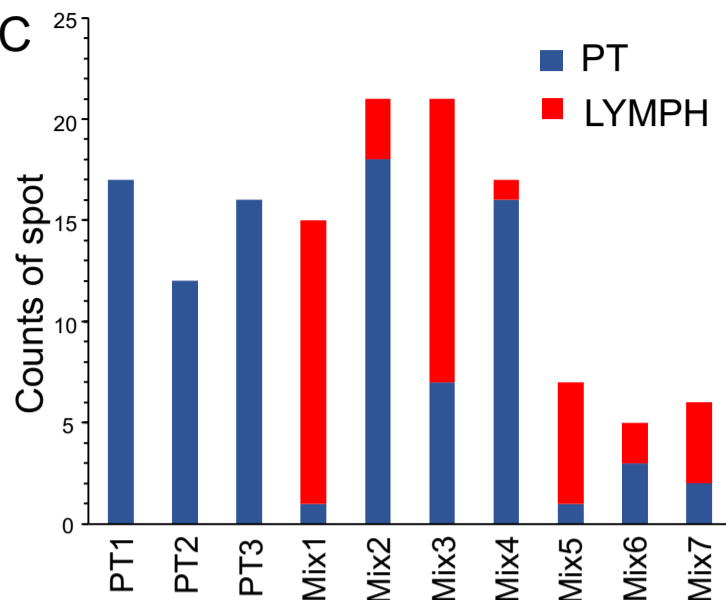

D Cancer to Stromal

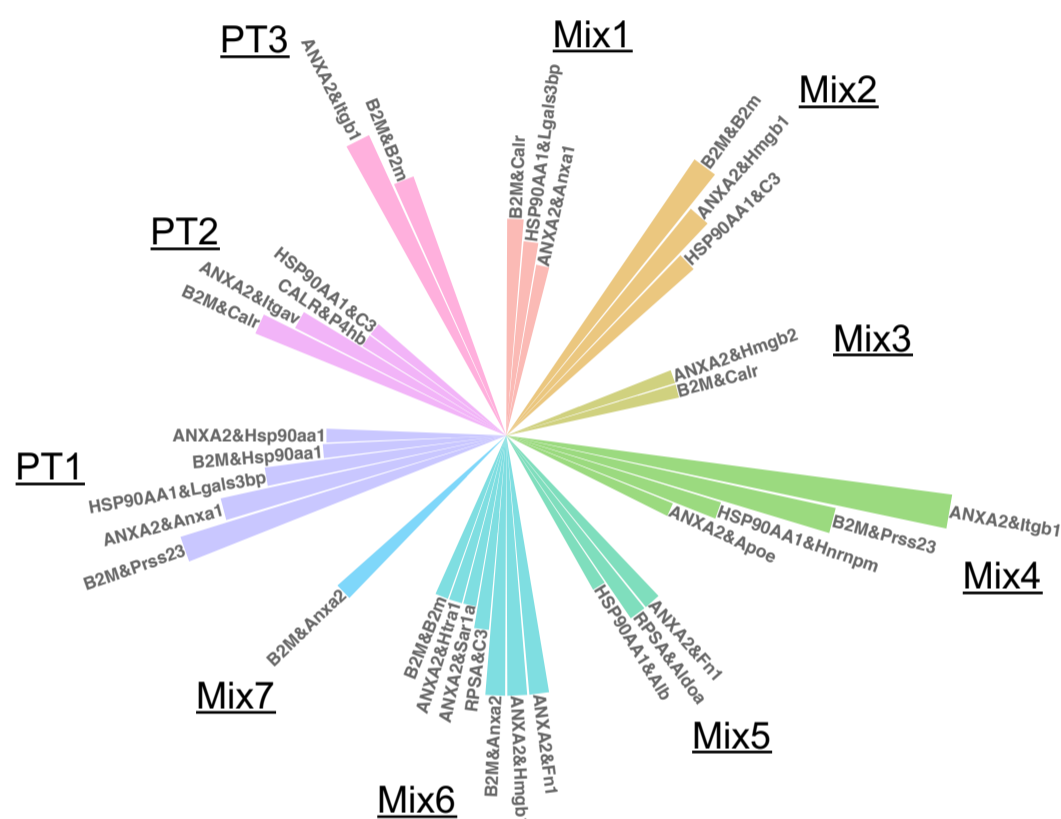

E

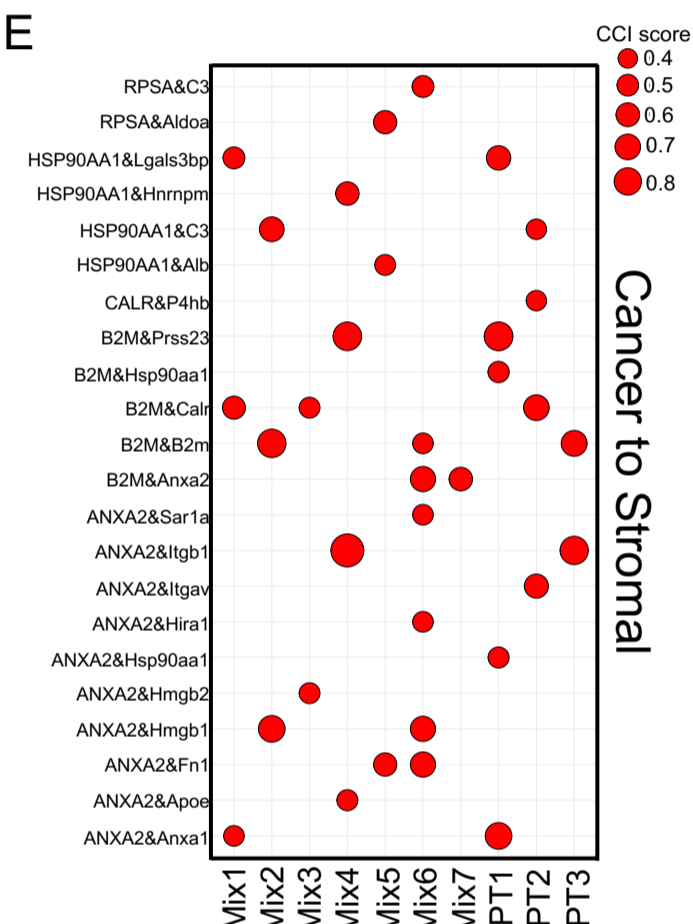

F Stromal to Cancer

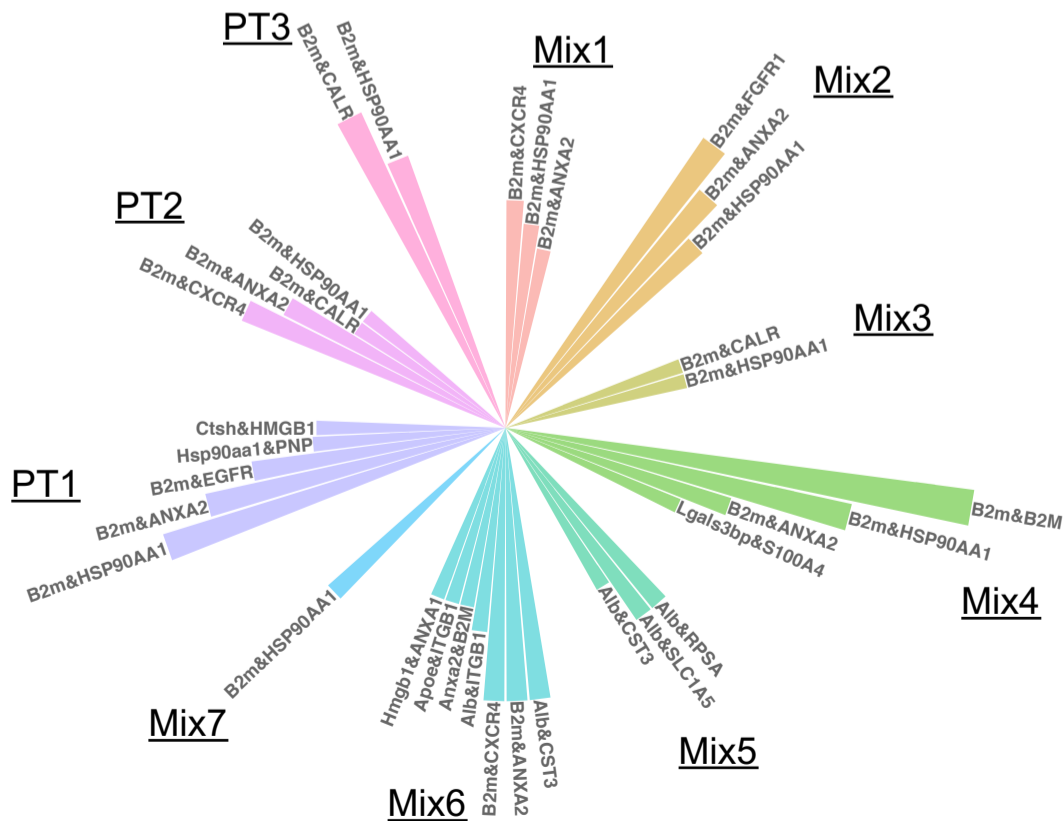

G

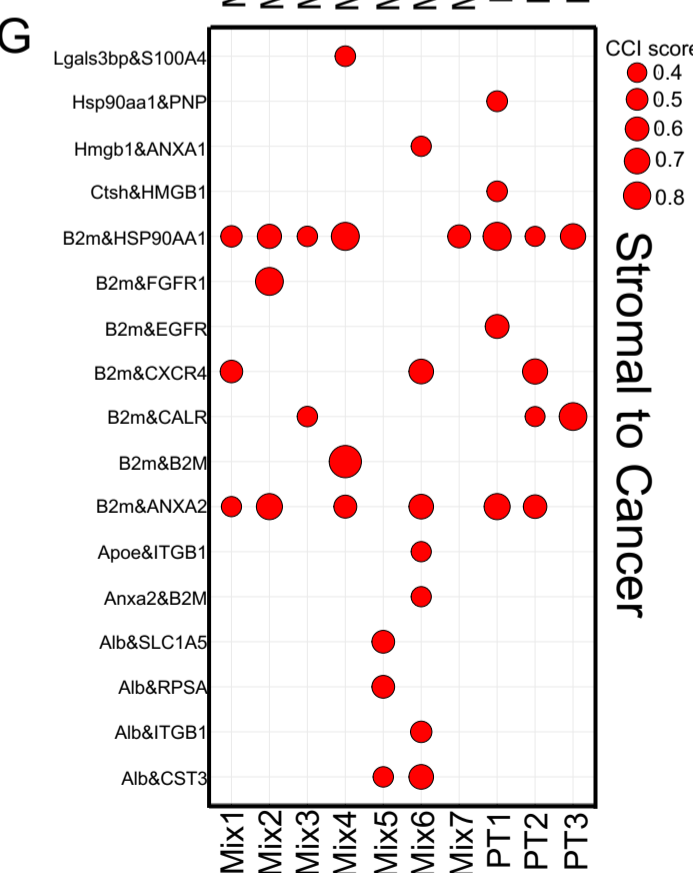

Figure 7

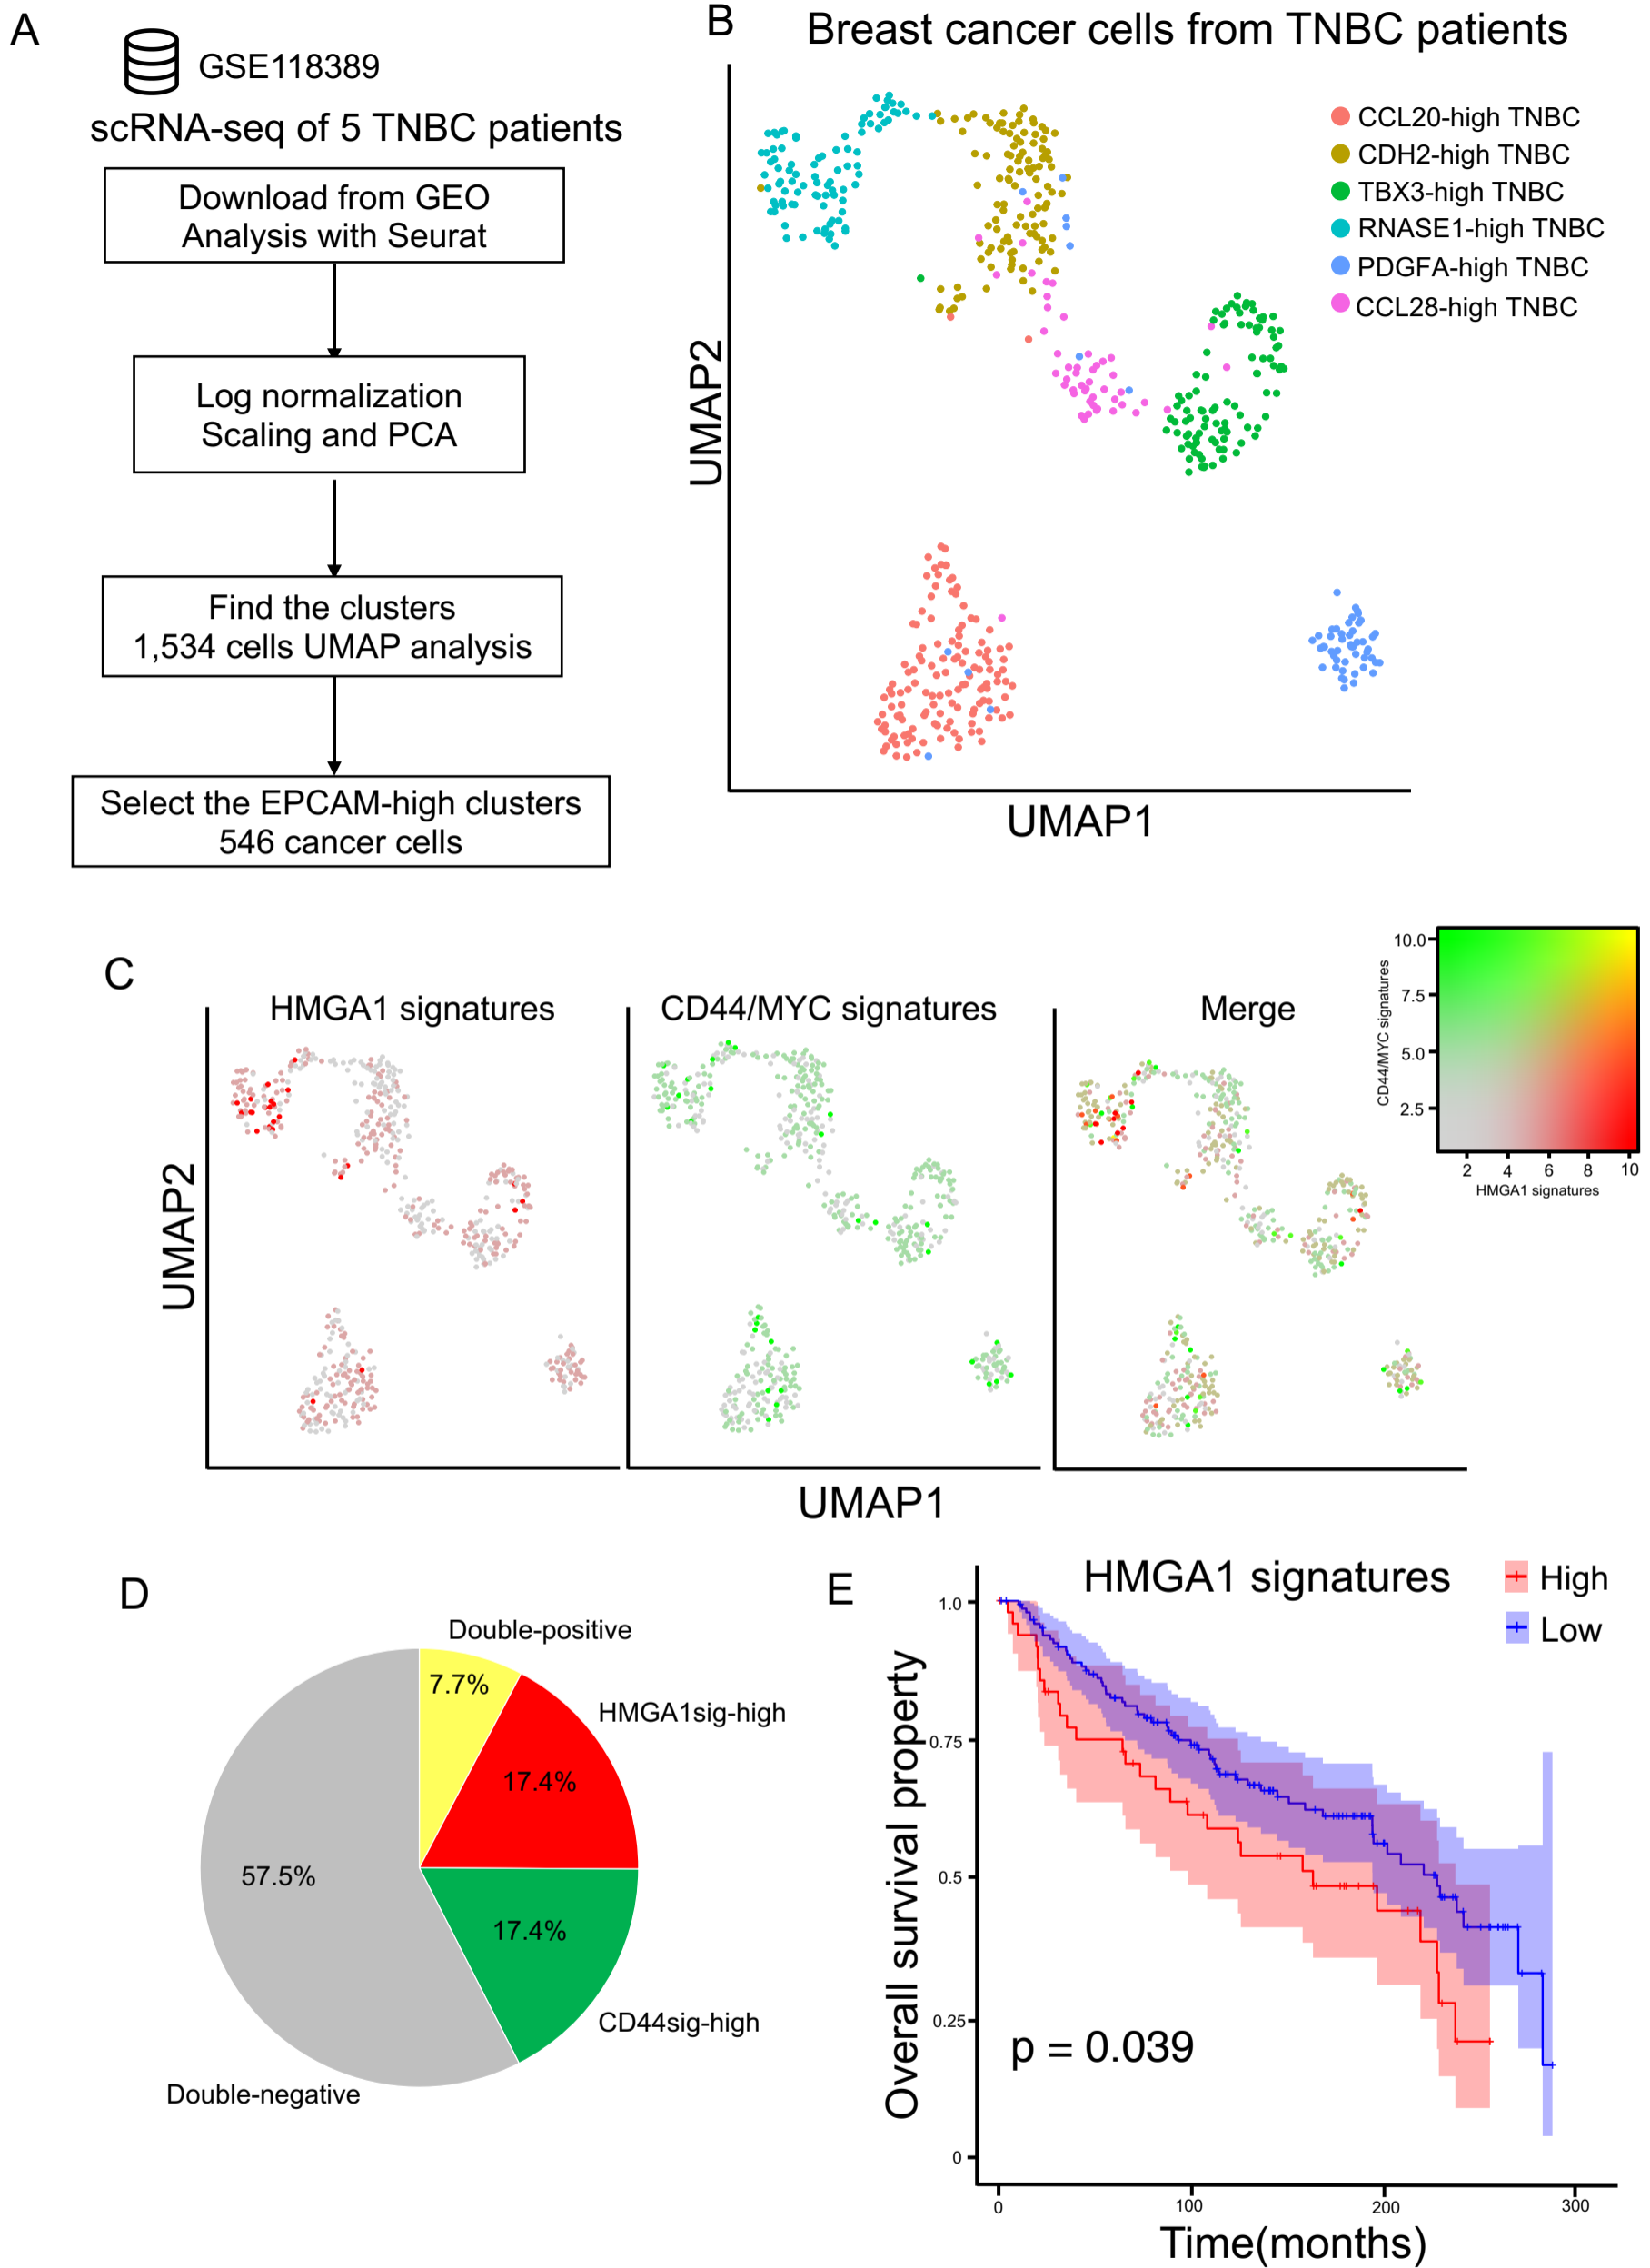



A

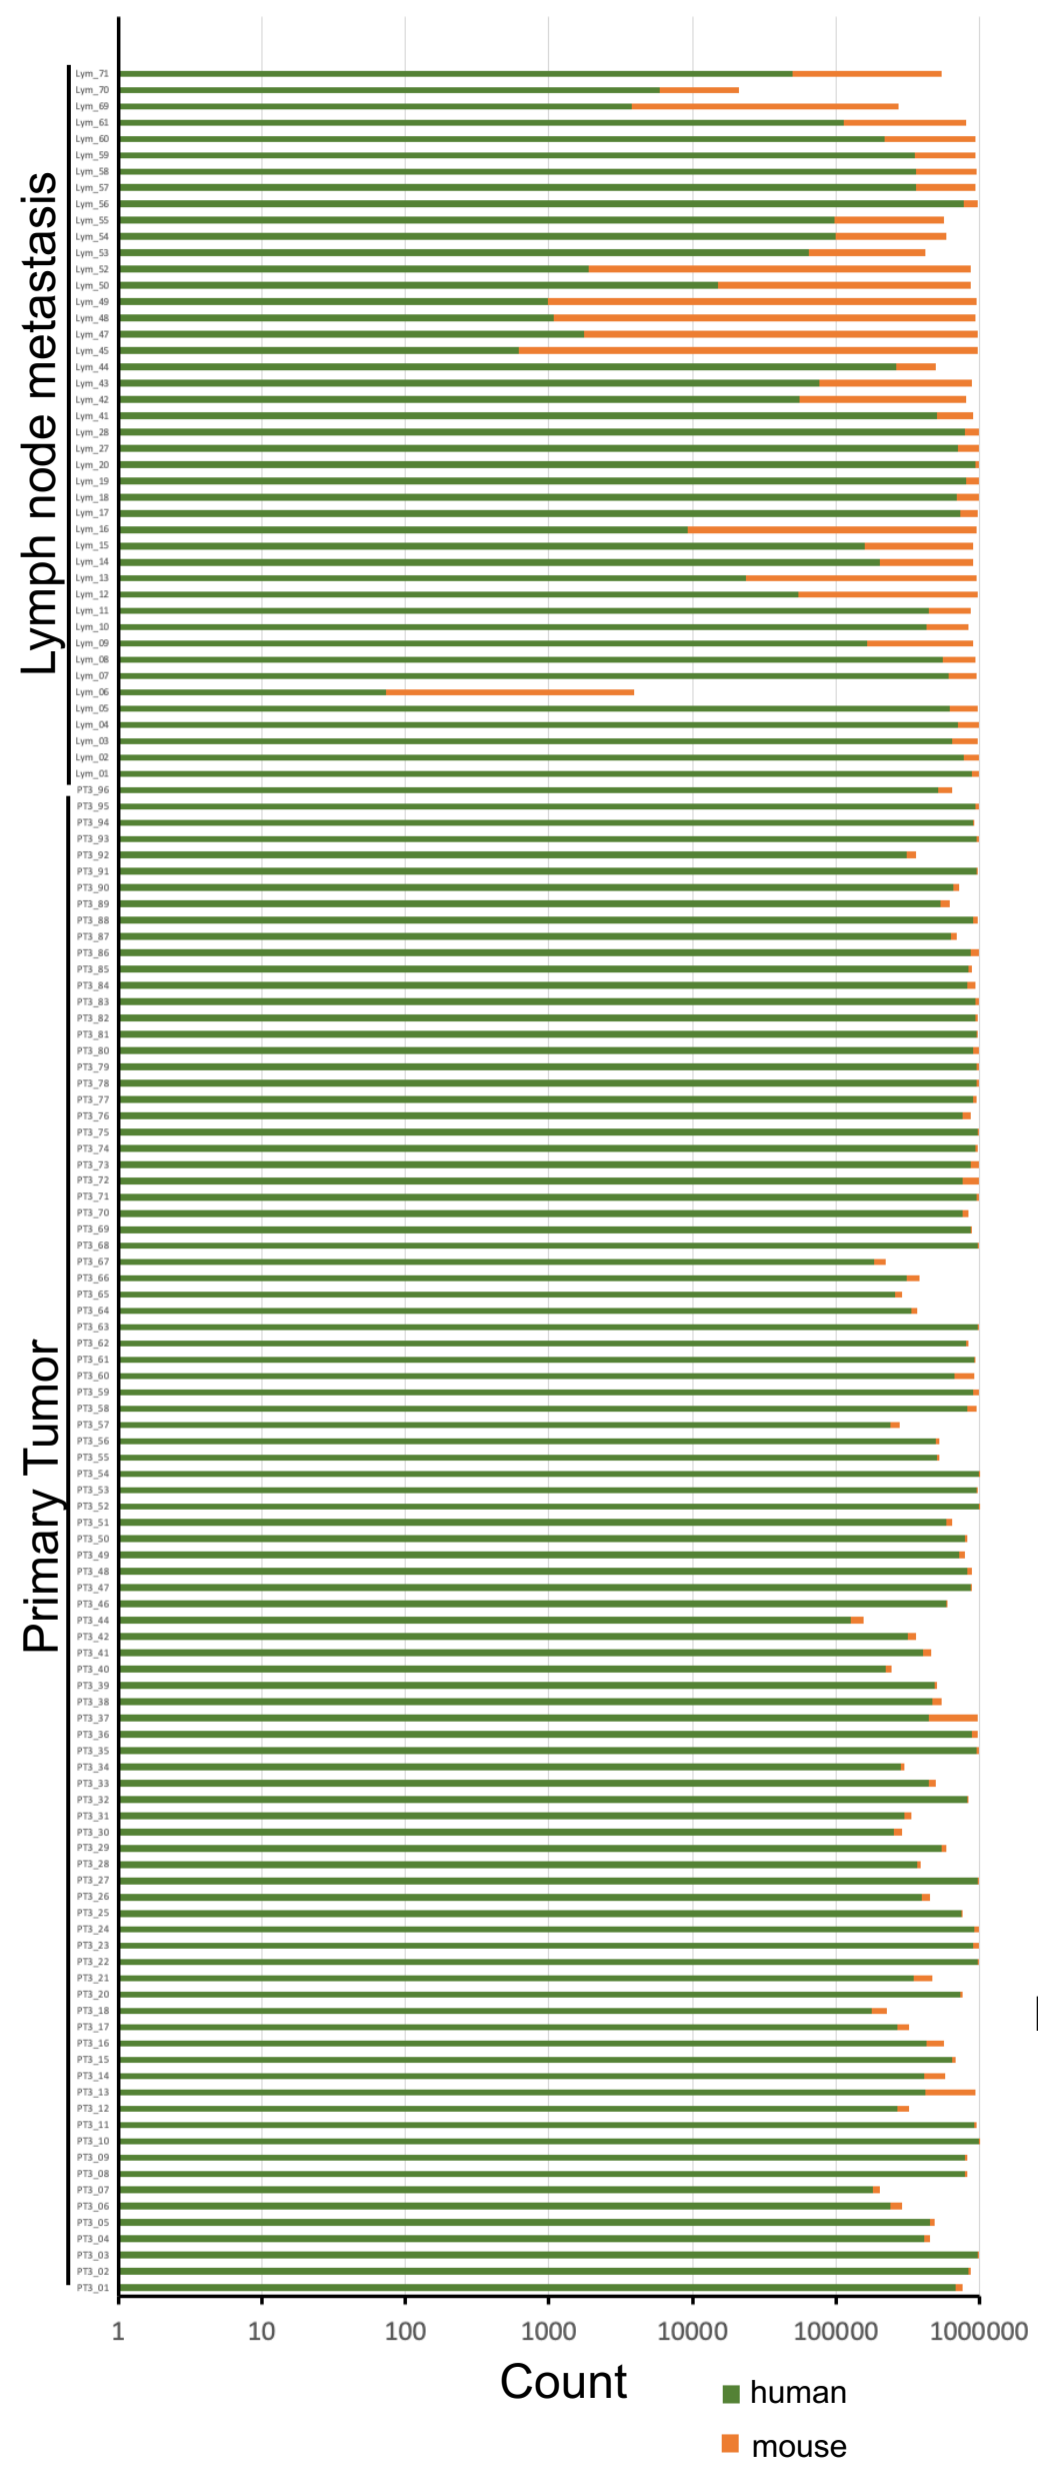

B

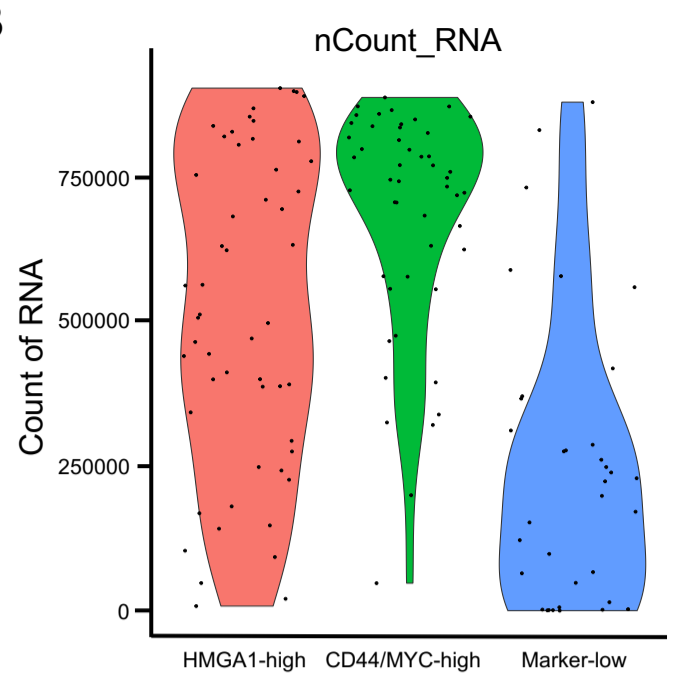

C

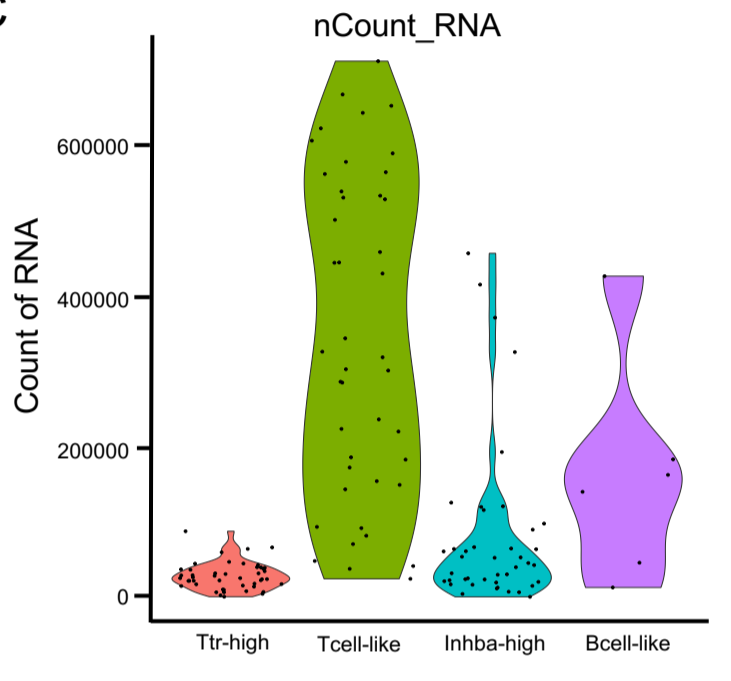

D

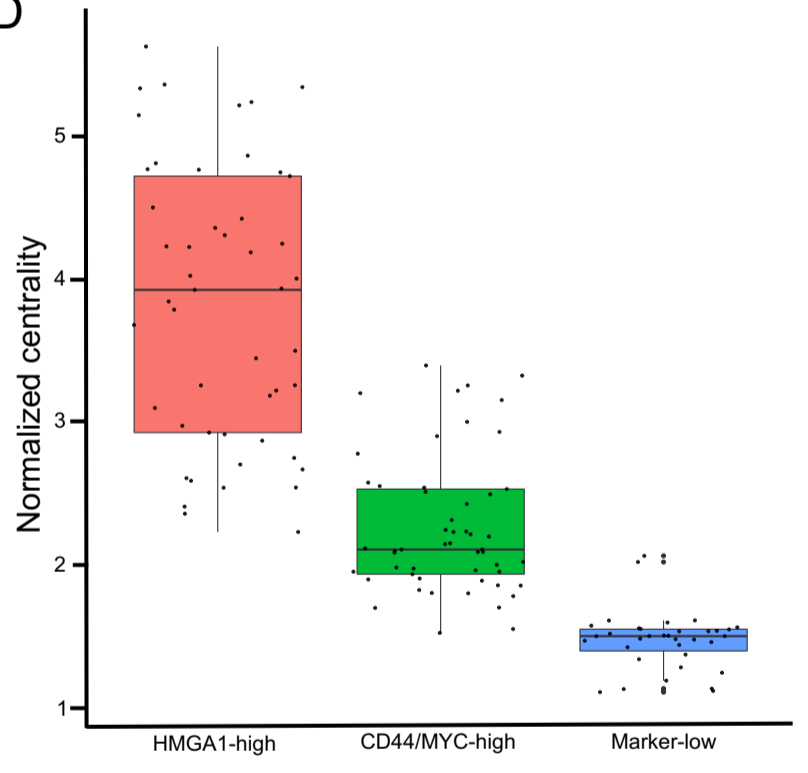

E

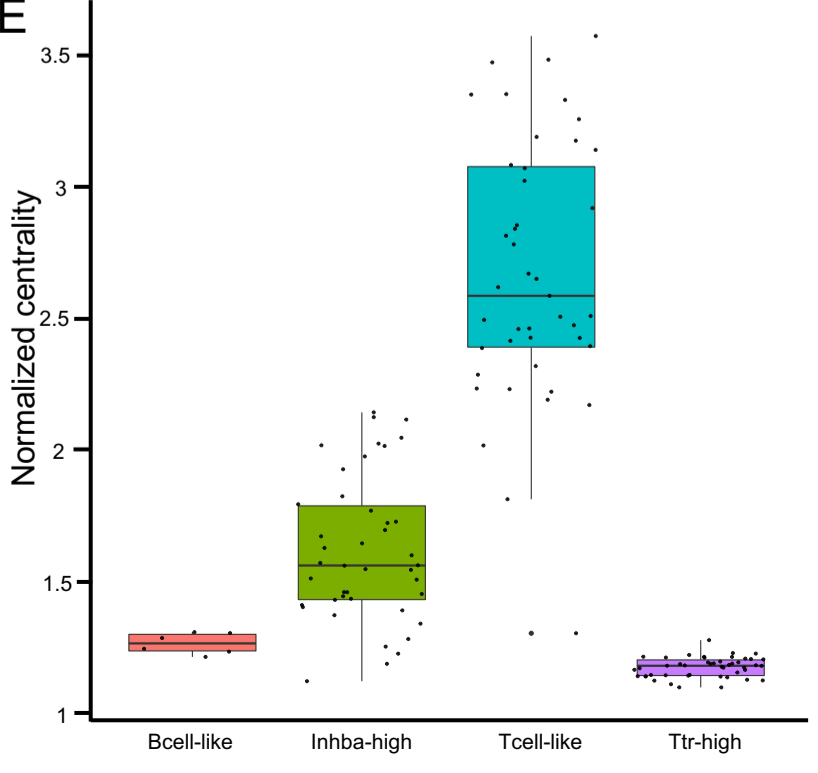

Supplementary Figure S2

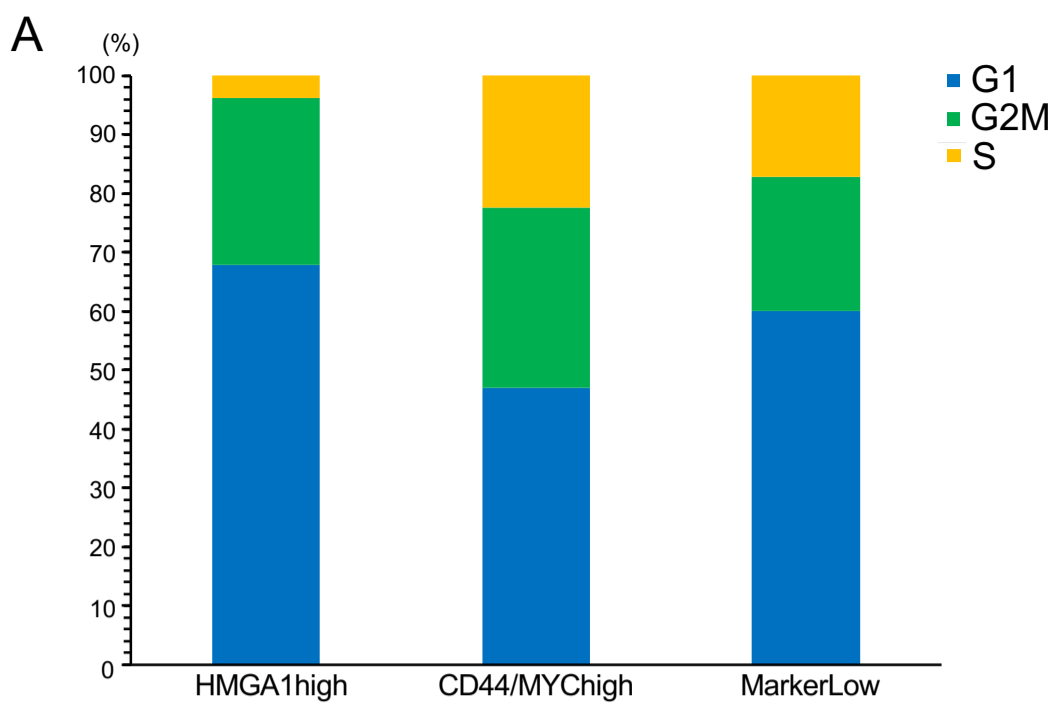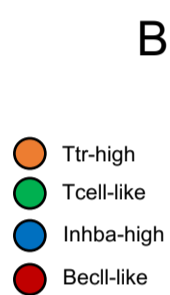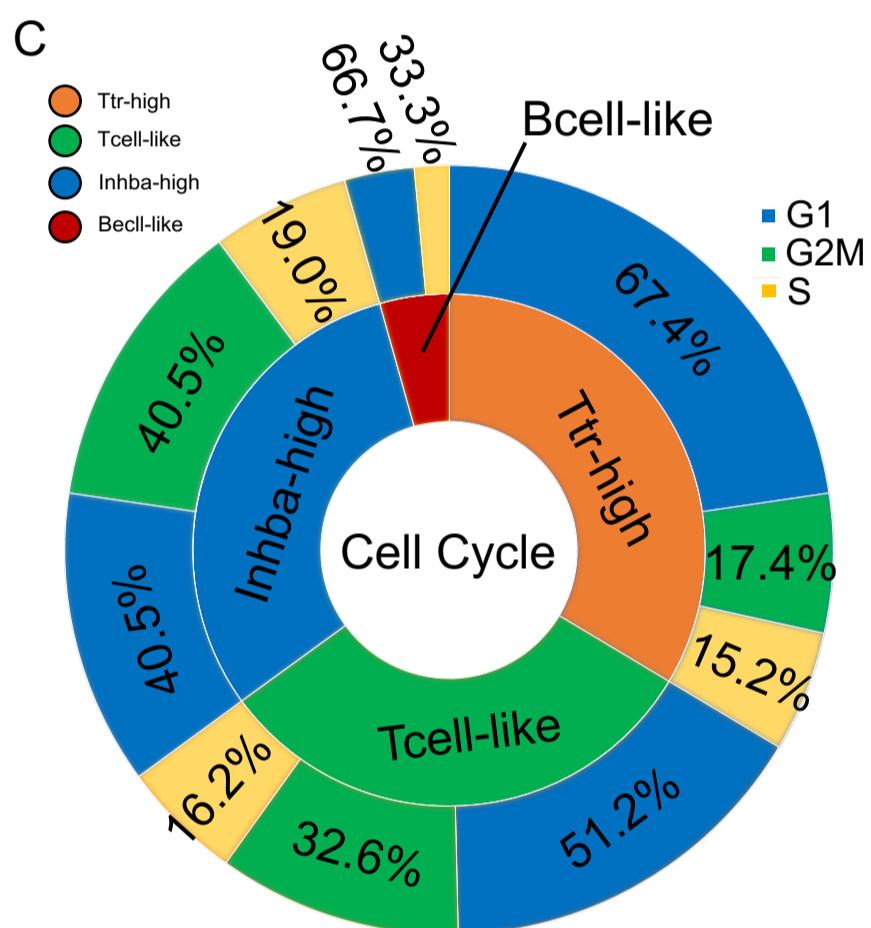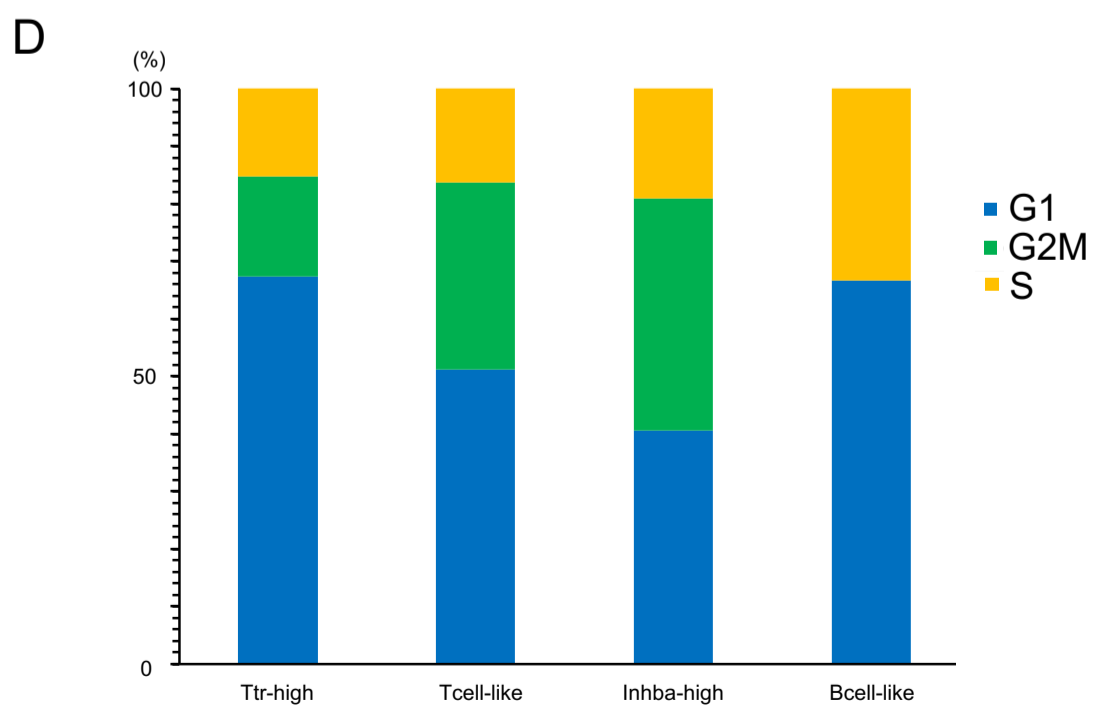



A

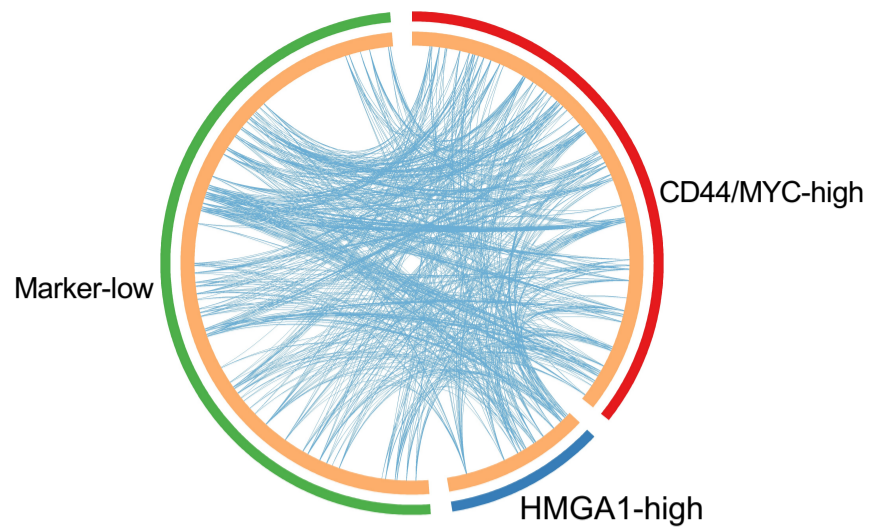

B

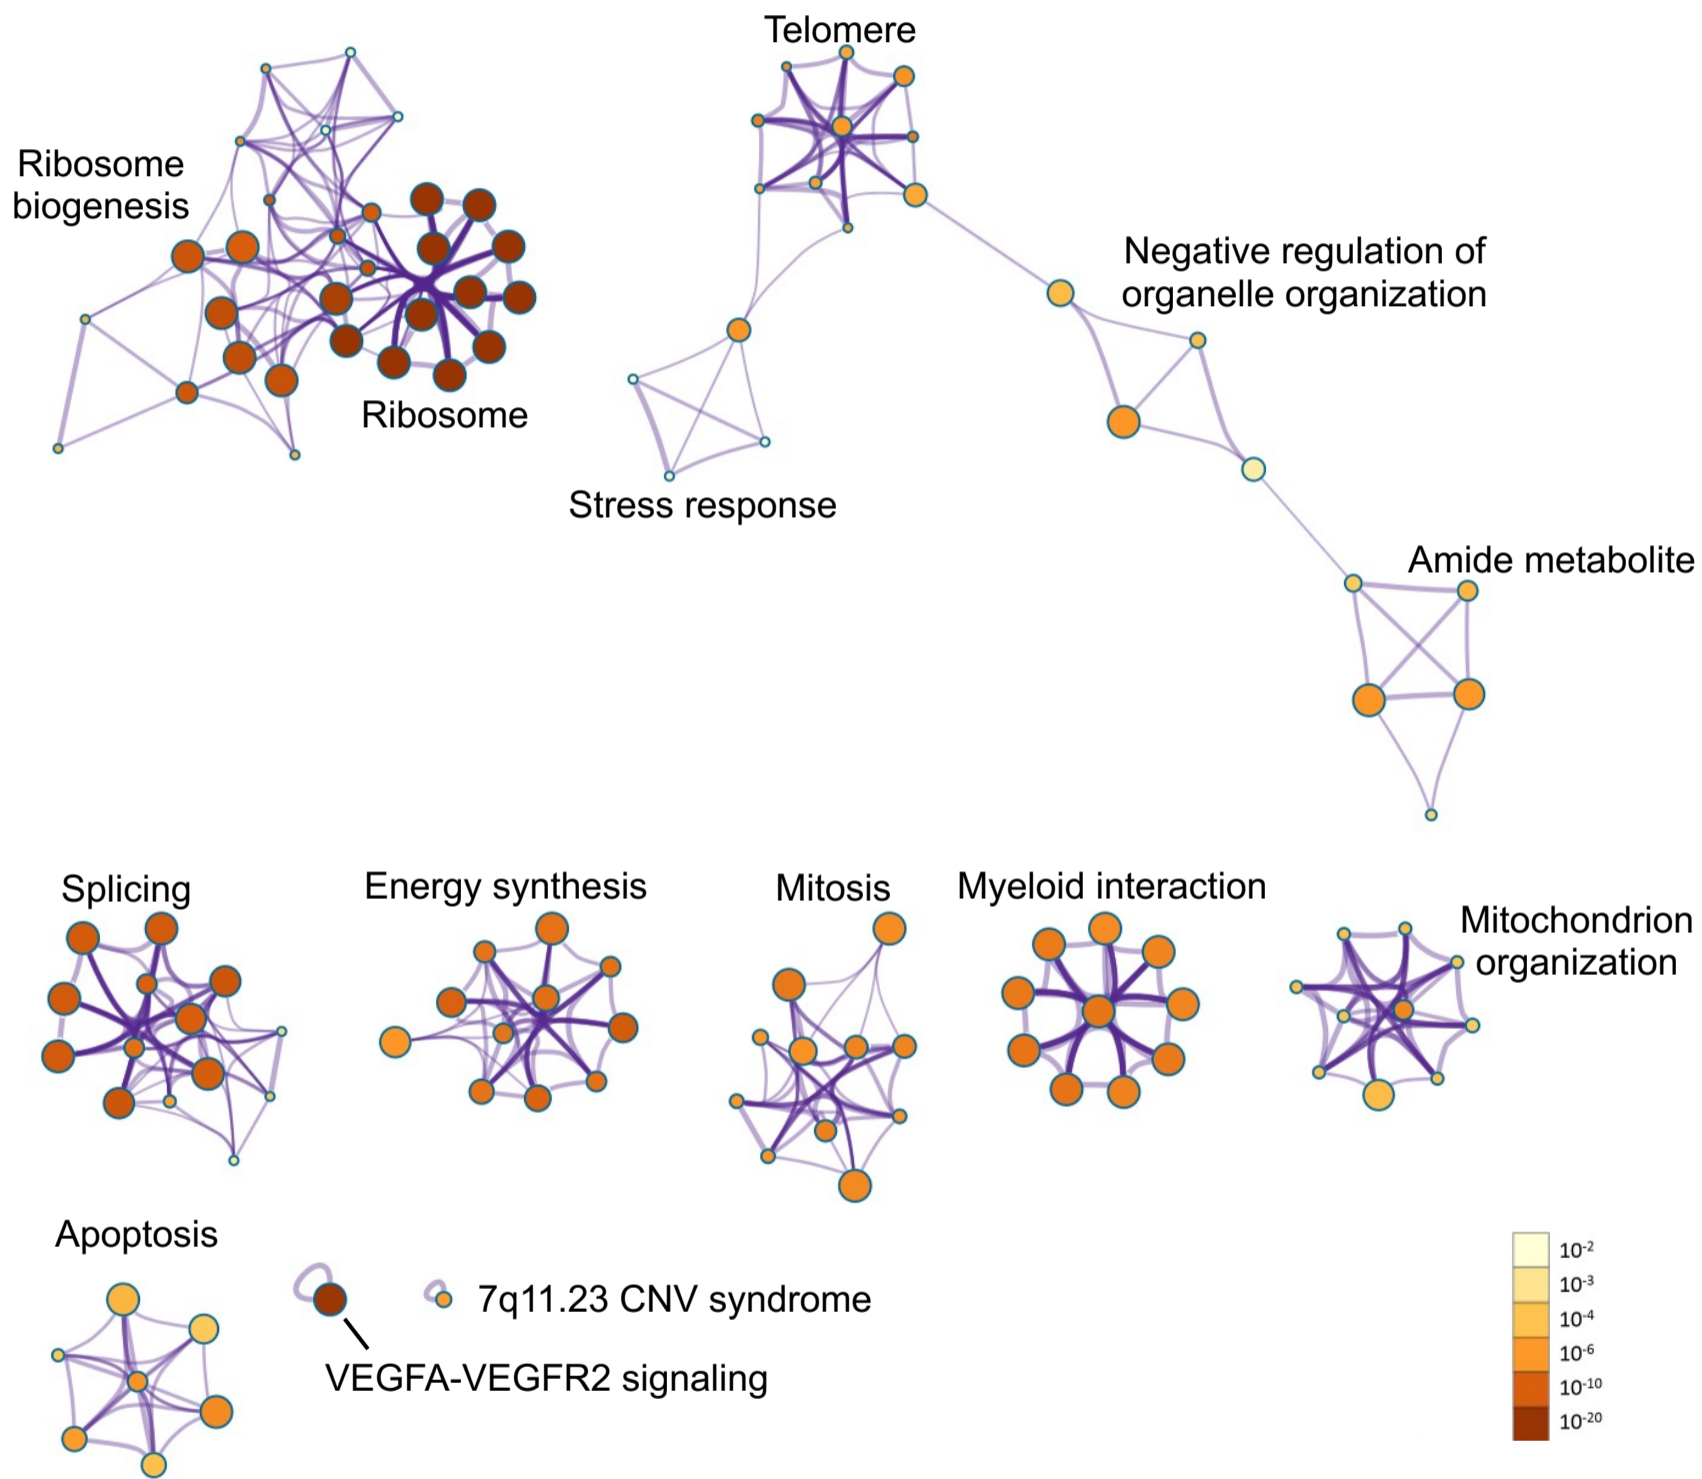

# Supplementary Figure S4

A

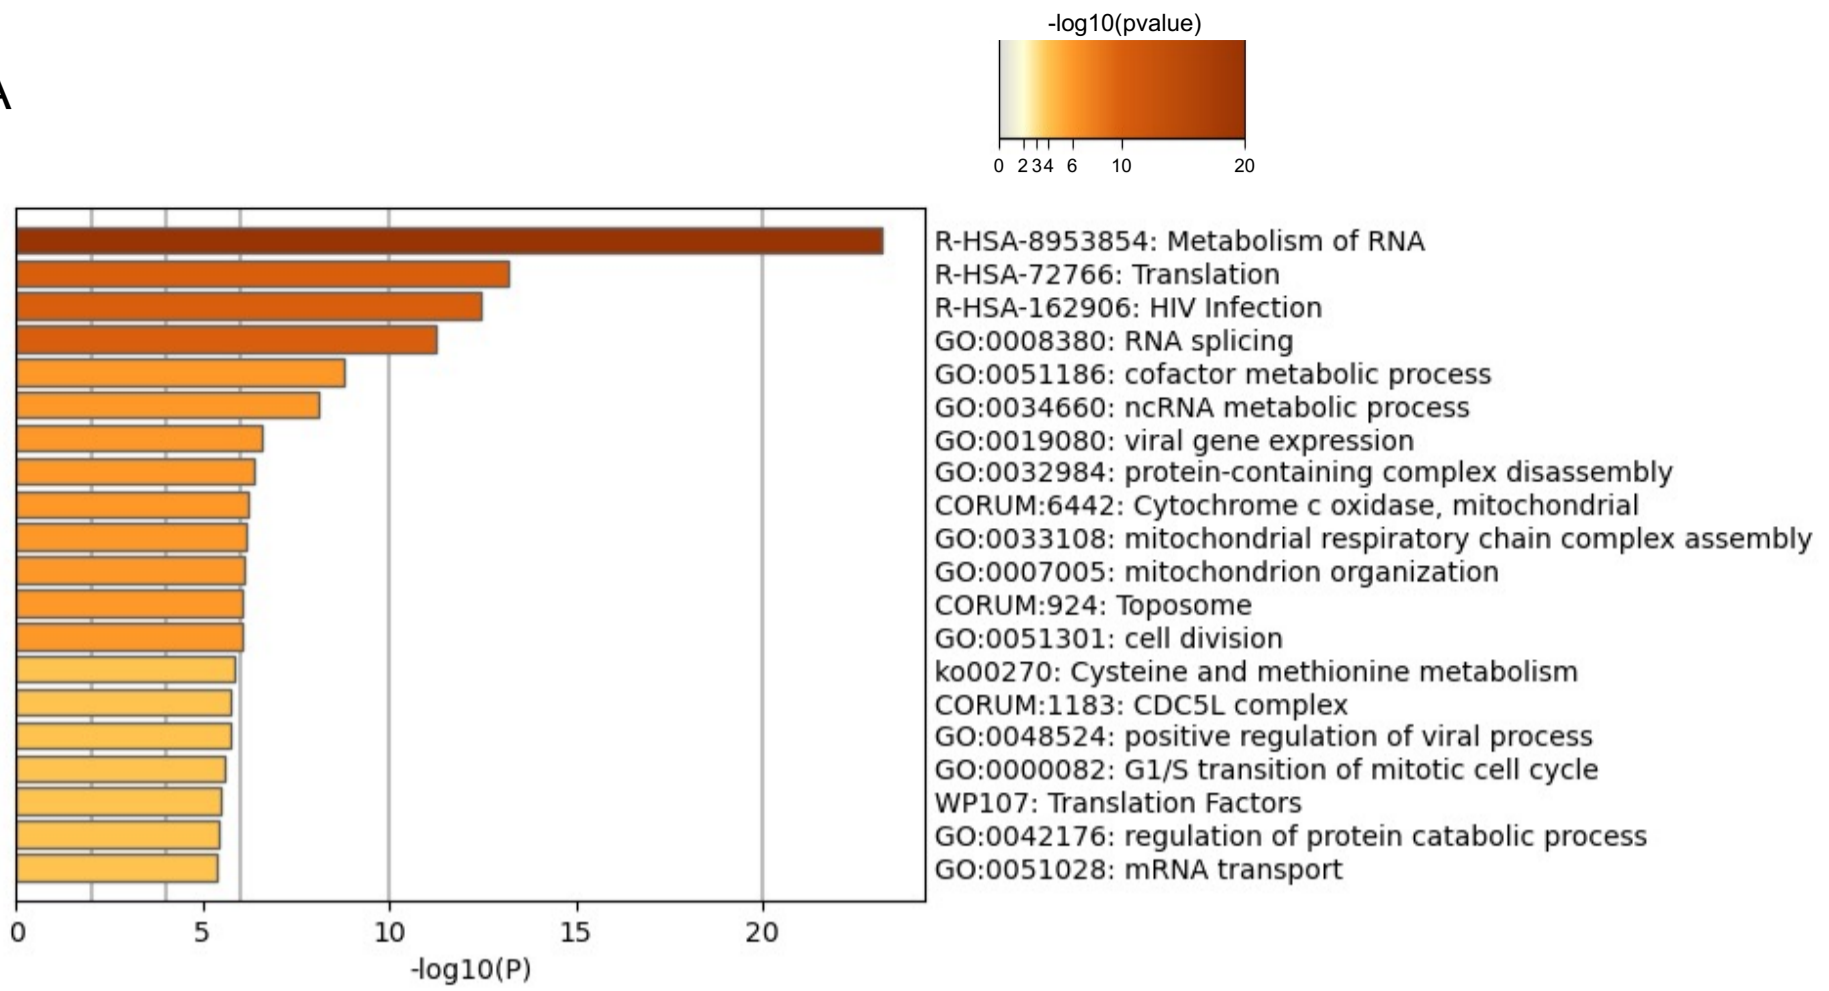

B

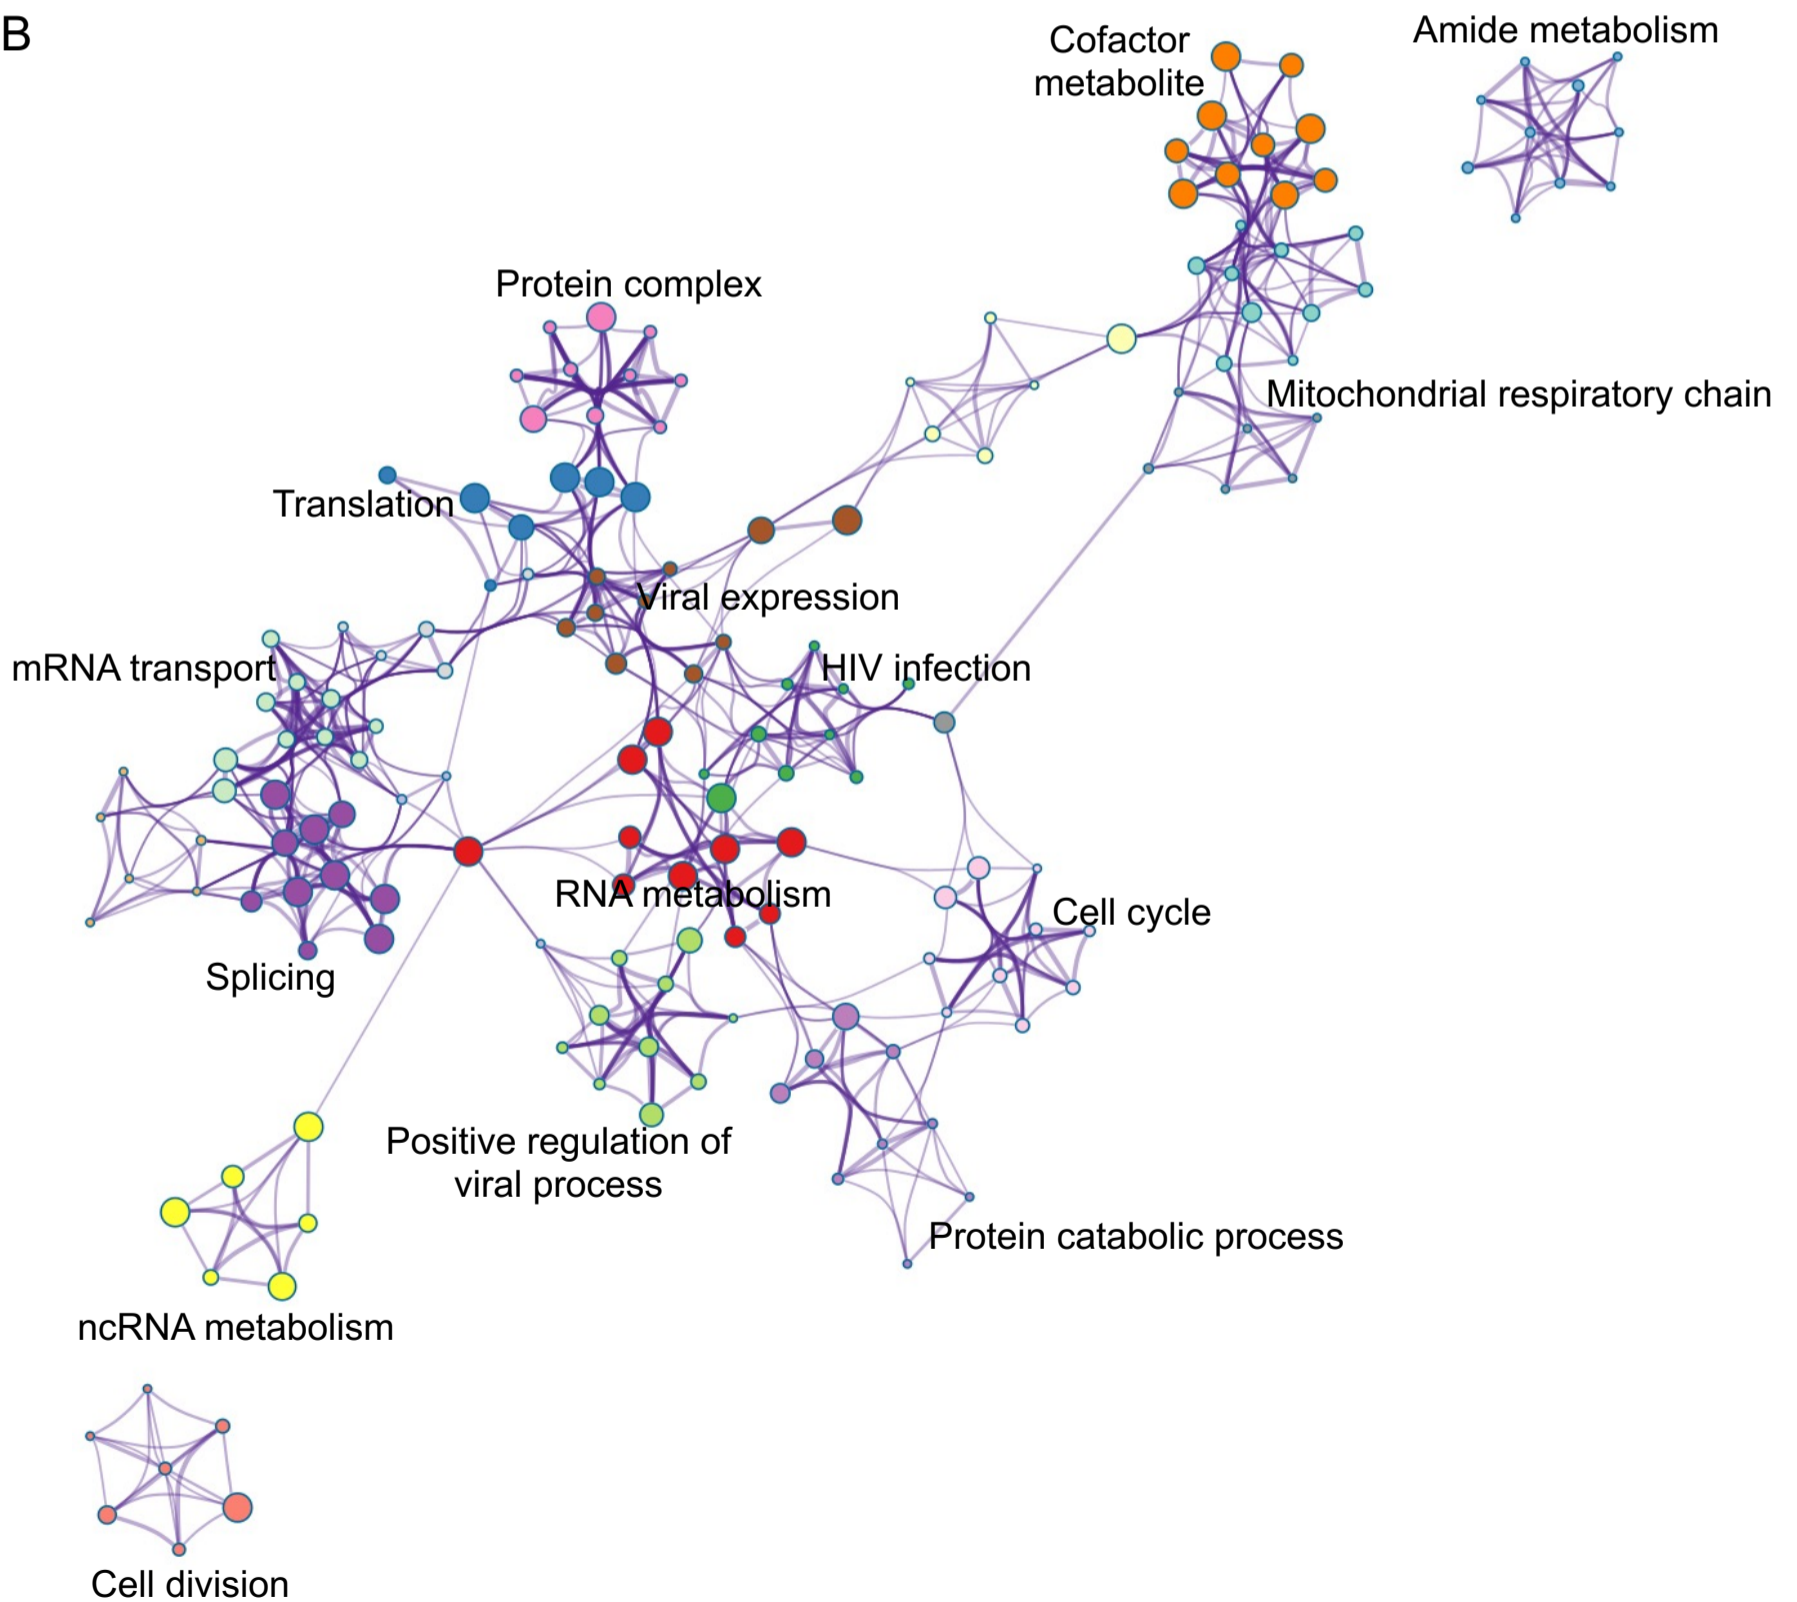



# Supplementary Figure S5

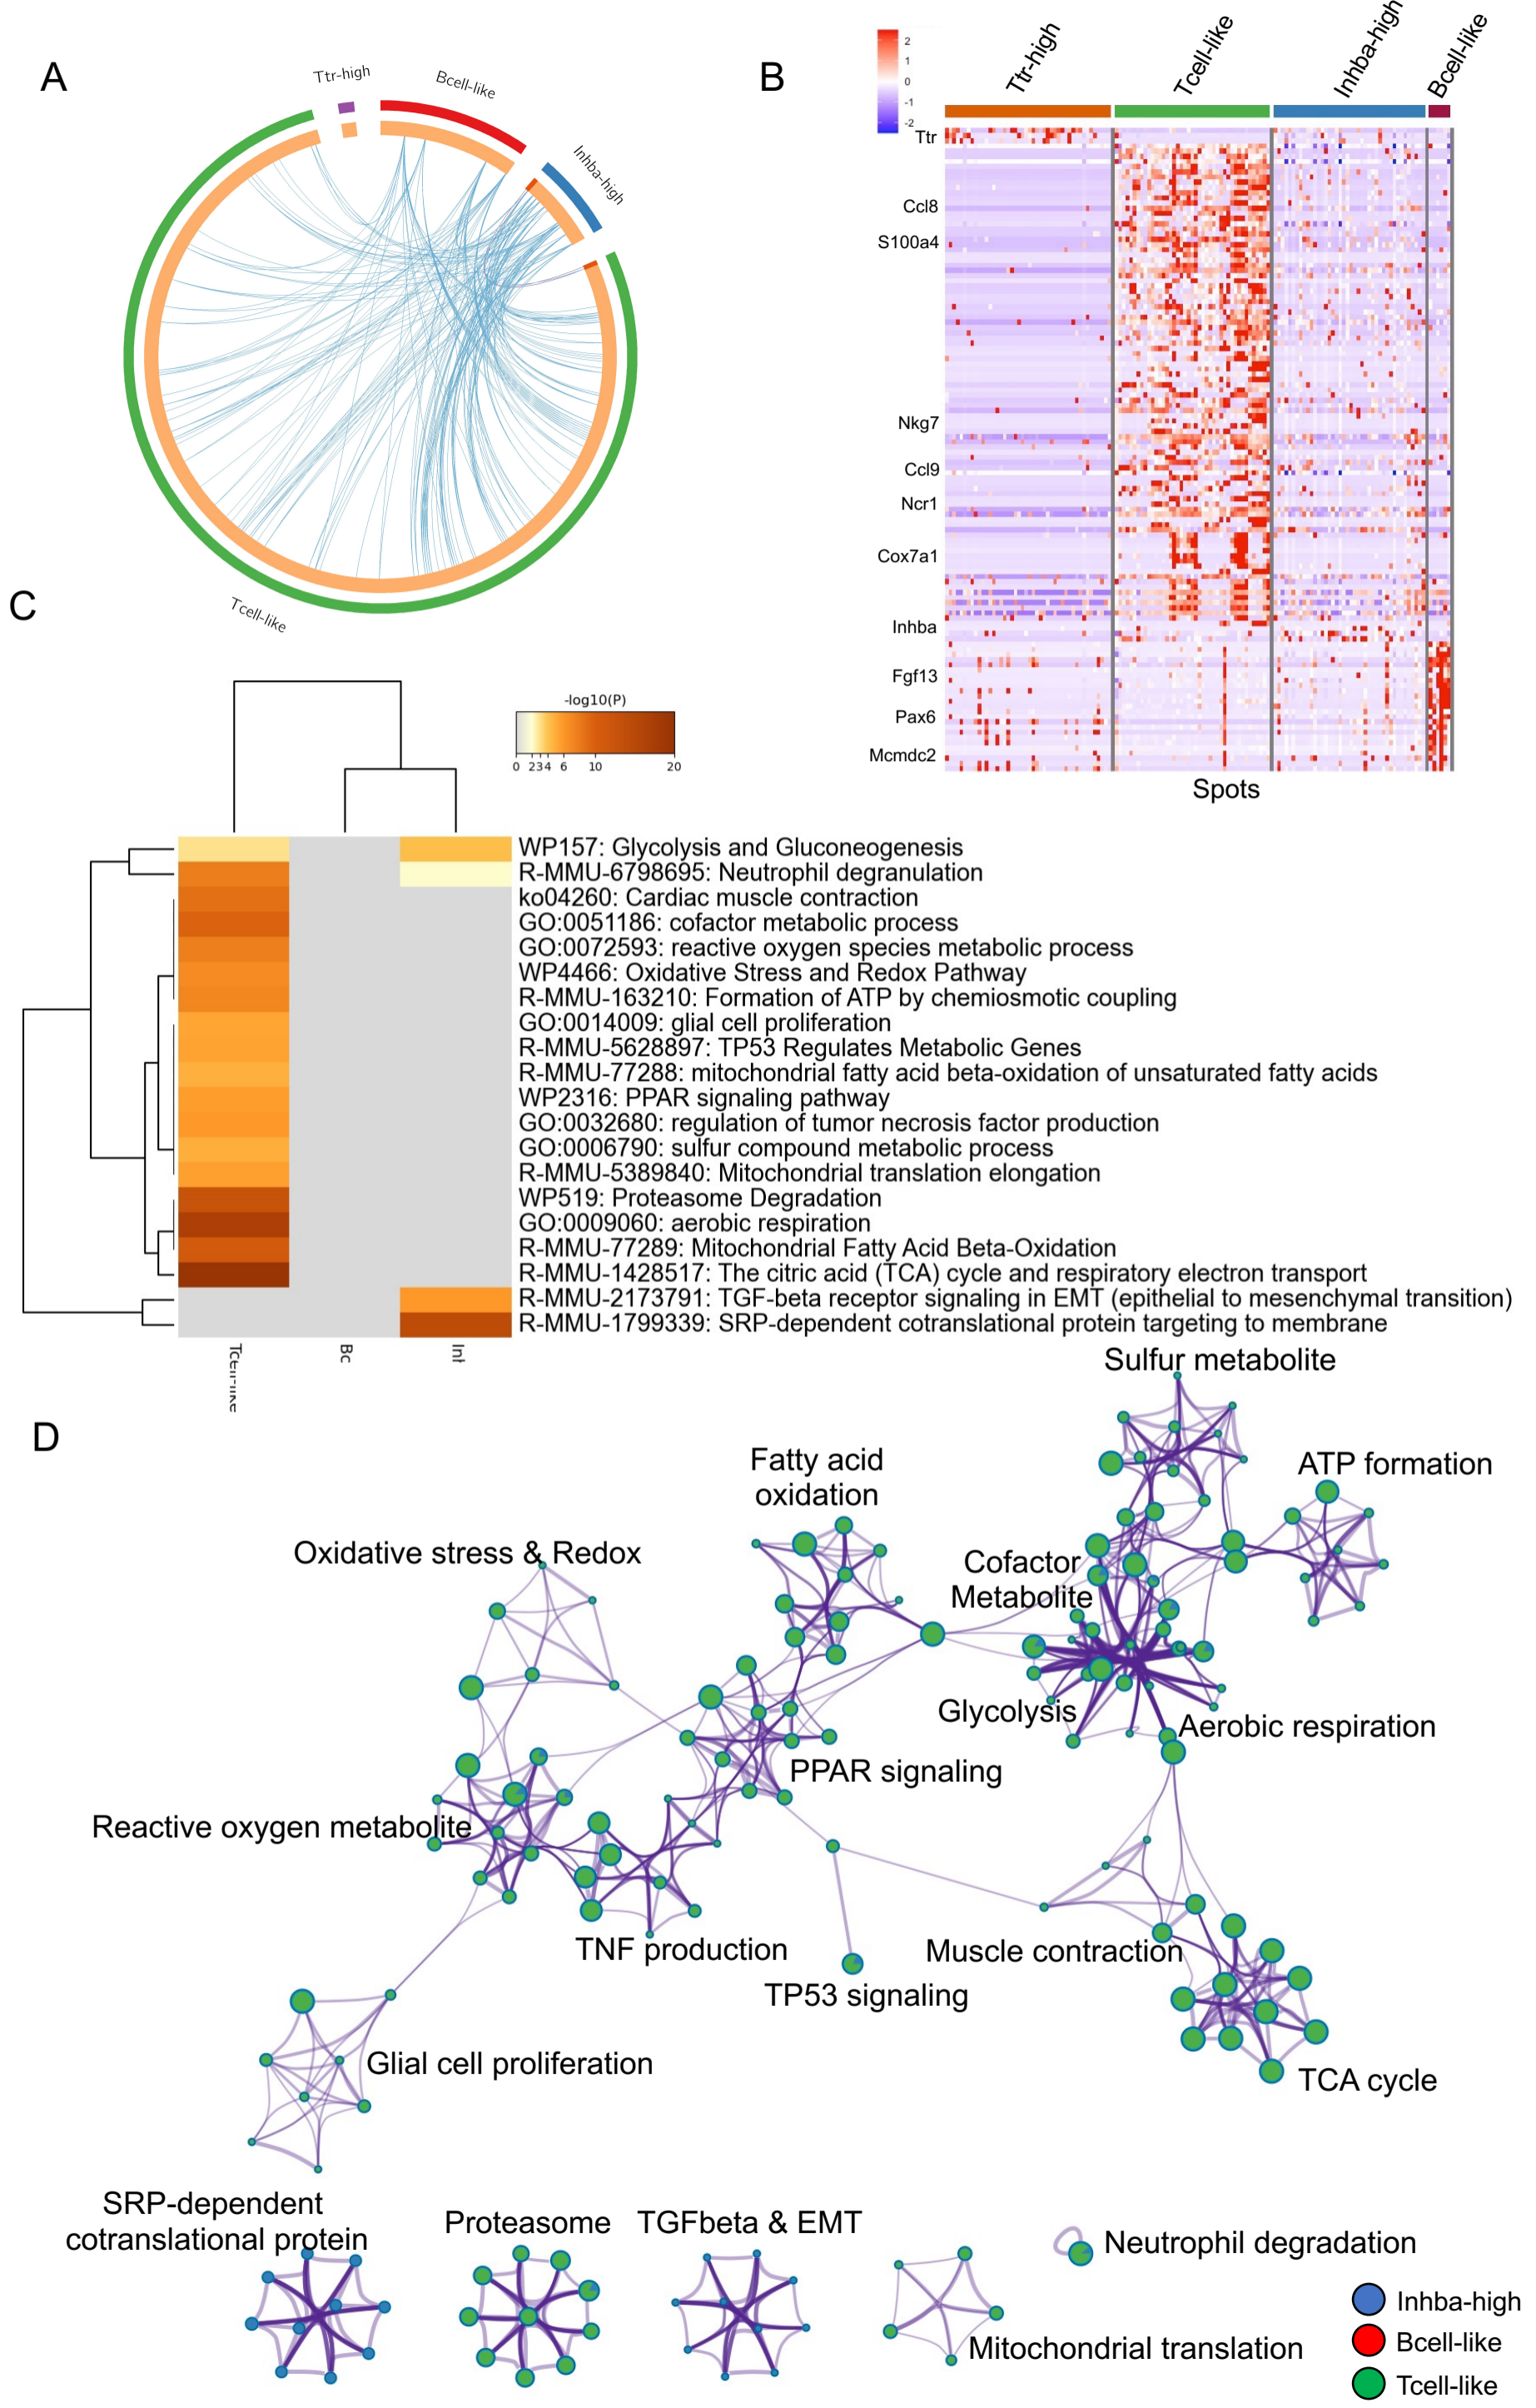



A

Cancer to Stromal Interaction

- LYMPH
- PT

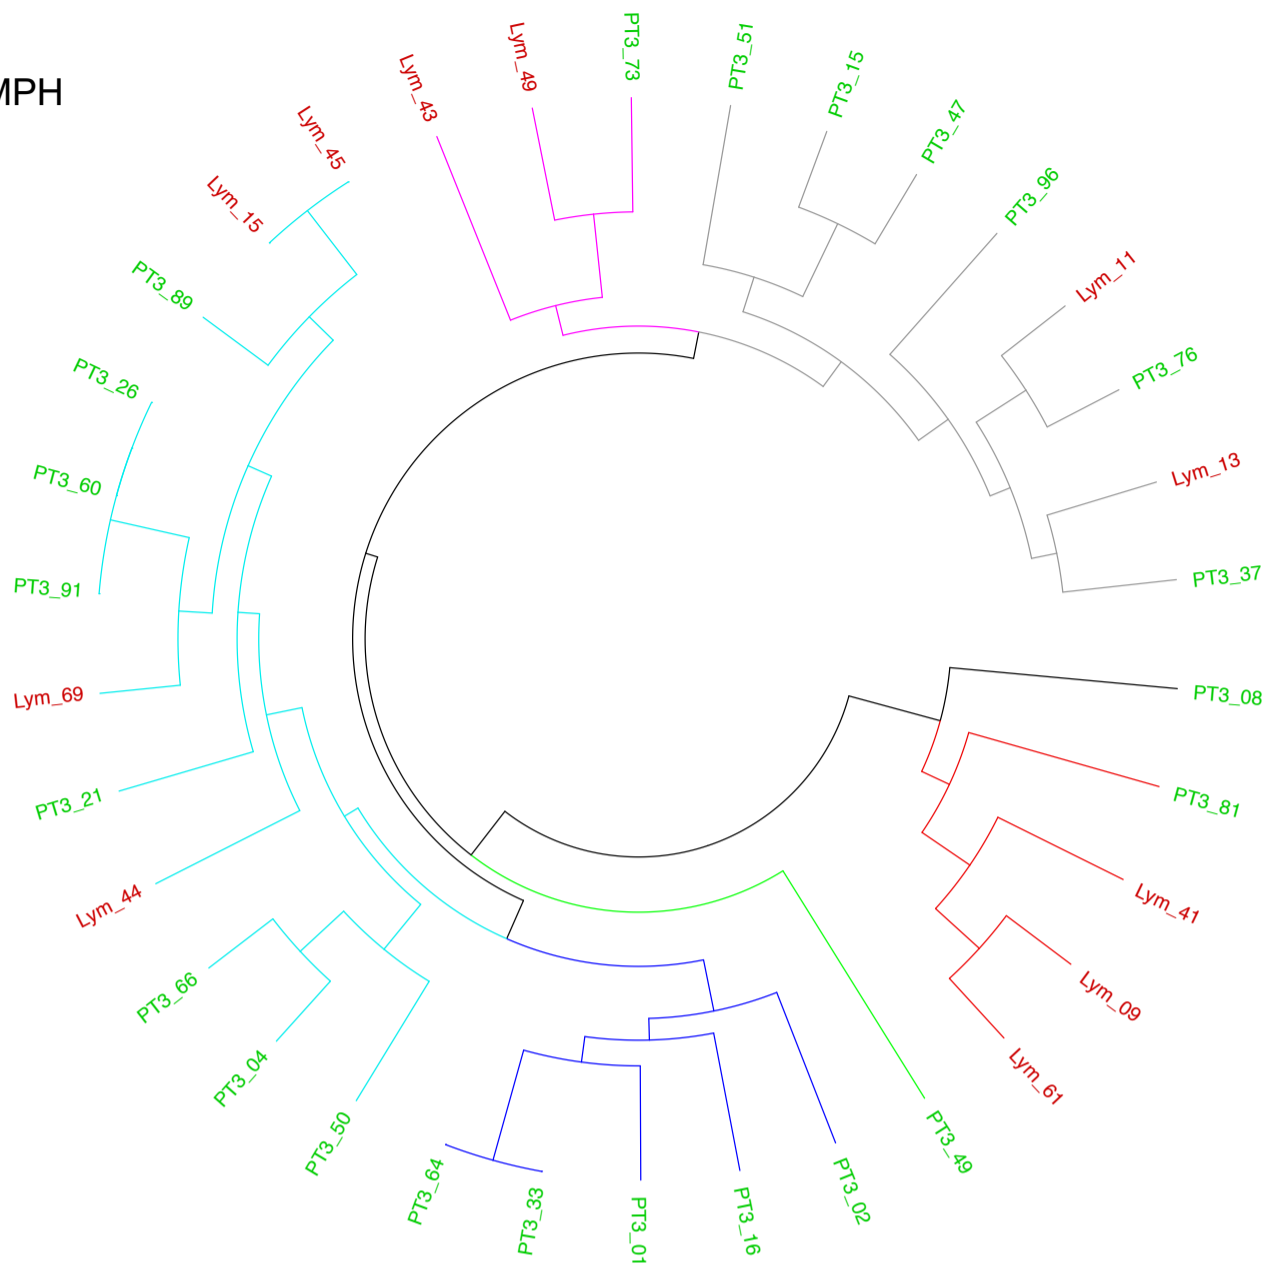

B 2 Lymph-PT interaction

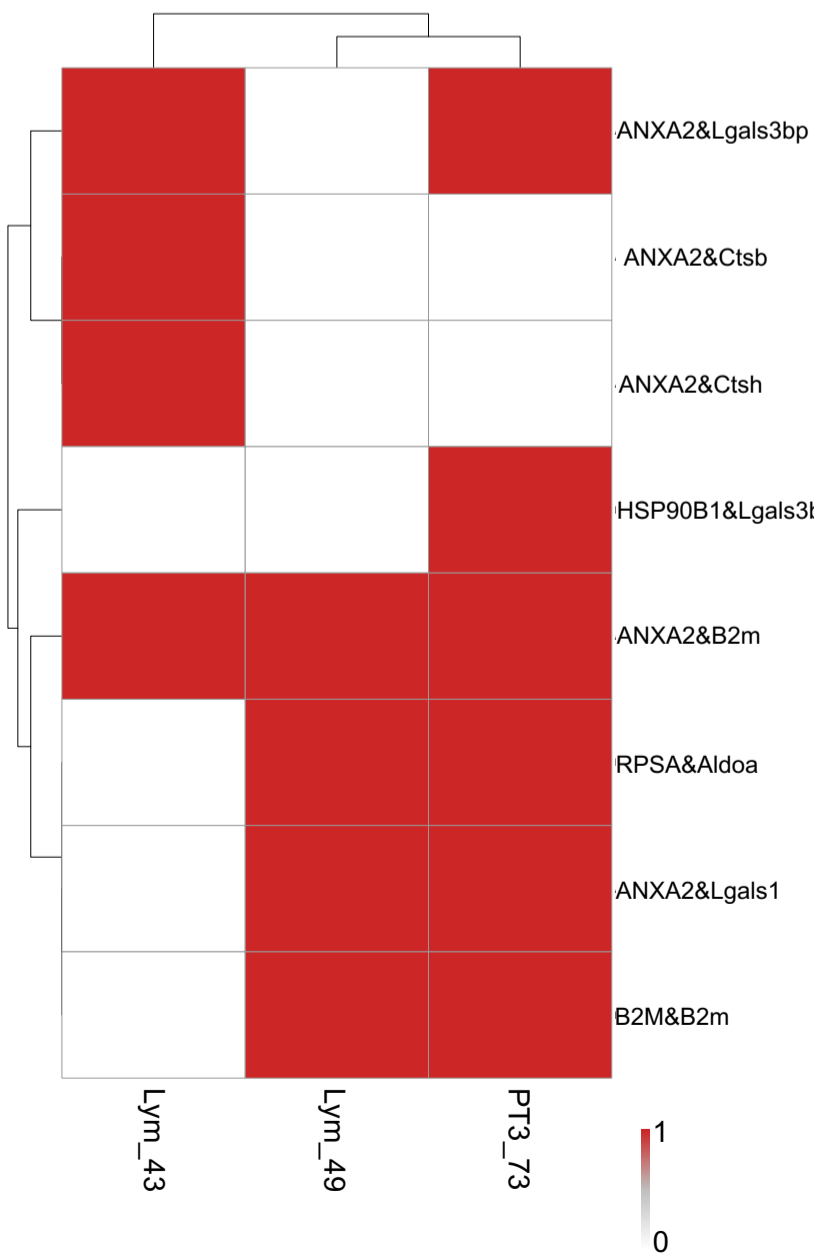

C 5 PT specific interaction

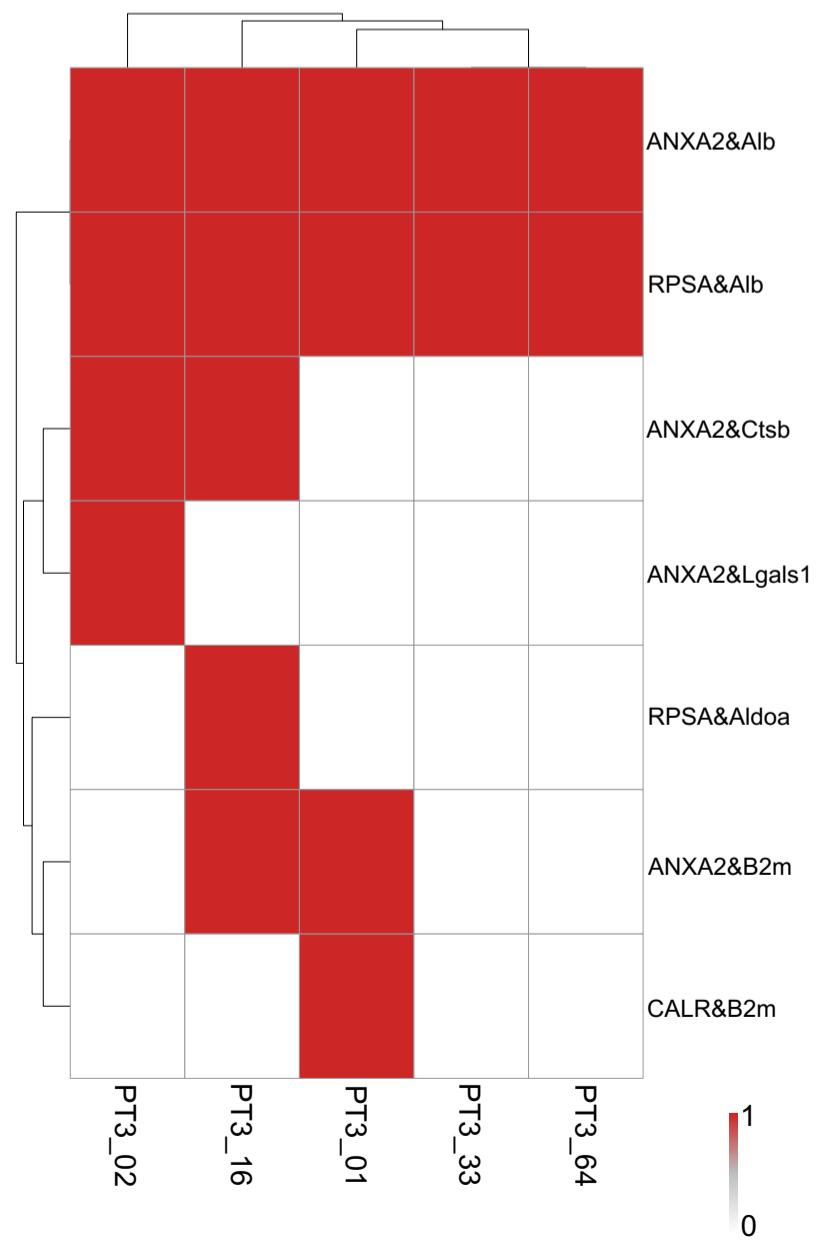

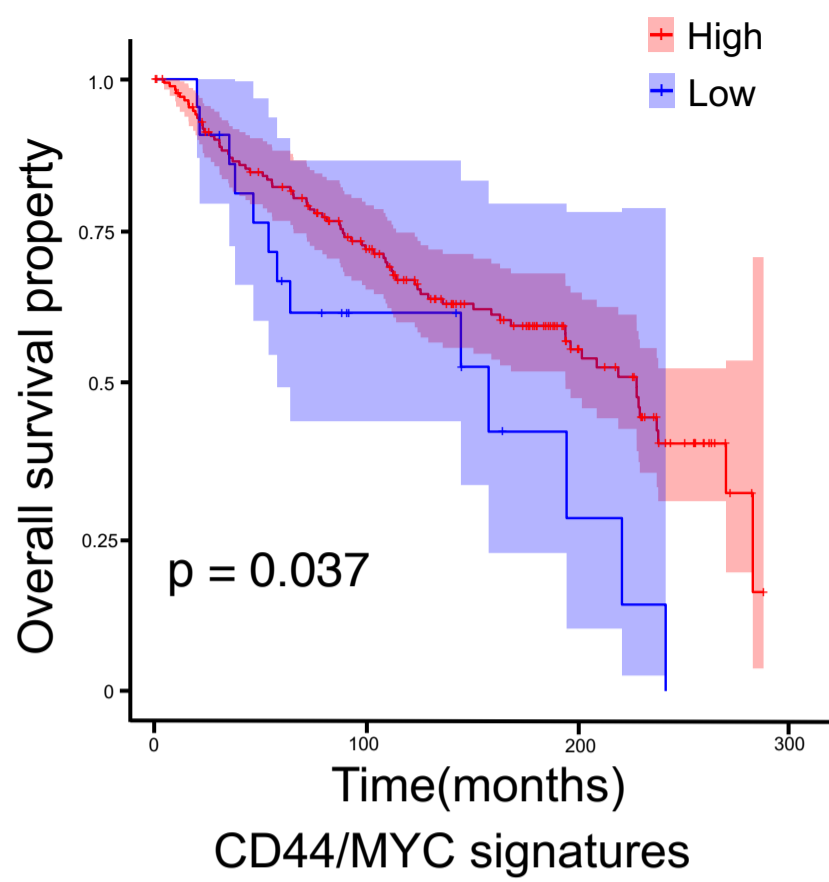

Source: http://biorxiv.org/content/10.1101/2021.10.21.465257v1.full.pdf
